# Supplementary material for: ION Thallos-HTL: a fluorescent thallium indicator that enables cell-selective and localizable thallium flux assays
Source: Royal Society of Chemistry journal article supplement (doi:10.1039/d4ob00535j), 2024-01-01
Supplement: d4ob00535j1.pdf [file d4ob00535j1.pdf]

## Supporting information

### **ION Thallos-HTL: a fluorescent thallium indicator that enables cell-selective and localizable thallium flux assays**

Miguel Macias-Contreras,\* Jessica P. Granados and Derek S. Hernandez\*

ION Biosciences, San Marcos, TX 78666, United States

Table of contents

|                                                        |     |
|--------------------------------------------------------|-----|
| Materials and general methods                          | S2  |
| Optical spectroscopy experiments                       | S2  |
| Stable cell line                                       | S4  |
| Syntheses and characterization                         | S5  |
| Metal ion selectivity                                  | S11 |
| Emission spectra and fluorescence traces               | S12 |
| Fluorescence images                                    | S13 |
| Fluorescence signal quantification                     | S17 |
| High-throughput screening (HTS) data                   | S18 |
| Copies of $^1\text{H}$ and $^{13}\text{C}$ NMR spectra | S19 |
| References                                             | S33 |

## Materials and general methods

Reagents and solvents were used as received from commercial sources. Thin layer chromatography (TLC) was carried out on silica gel F-254 plates. Preparatory TLC was performed on silica gel 60 Å extra hard layer F-254 plates. Flash column chromatography was performed using 60-20 µM (70-230 mesh) silica gel. <sup>1</sup>H and <sup>13</sup>C NMR spectra were acquired at 400/600 and 150 MHz, respectively. Chemical shifts are reported in δ (ppm) relative to the residual CHCl<sub>3</sub> (δ<sub>H</sub> 7.26, δ<sub>C</sub> 77.2). NMR spectra and High resolution mass spectra were obtained at the Small Molecule NMR Facility Core and the Mass Spectrometry Research Center at Vanderbilt University, respectively. The composition of the sodium gluconate buffer used in this study is 138 mM sodium gluconate, 1.26 mM CaSO<sub>4</sub>·2H<sub>2</sub>O, 0.90 mM MgSO<sub>4</sub>·7H<sub>2</sub>O, 5.56 mM glucose, and 20 mM HEPES.

## Optical spectroscopy

Lyophilized samples of Thallos and **ION Thallos-HTL** were dissolved in DMSO (10 µL) and hydrolyzed with 0.1 M KOH (30 µL). After 15 minutes, deionized water was added to reach a final volume of 200 µL. Final concentrations of Thallos and **ION Thallos-HTL** were 213 µM and 298 µM, respectively. Complete hydrolysis was confirmed by low resolution MS. Fluorescence measurements were performed using a plate reader (Cytation 5, Biotek). Fluorescence polarization measurements were conducted on a plate reader (Flexstation 3, Molecular Devices). Fluorescence emission spectra were collected on a fluorimeter (Fluoromax Plus, Horiba Scientific). Results were processed and presented as graphics using Prism software.

**Fluorescence quantum yields.** Fluorescence quantum yield (Φ) values are reported relative to the standard fluorescein in 0.1 M NaOH (Φ = 0.79).<sup>1</sup> The unknown samples (after hydrolysis with KOH) were diluted in PBS pH 7.4 and measurements were done in the absence and presence of Tl<sup>+</sup> (5 mM). The refractive indexes for 0.1 M NaOH and PBS are 1.3344<sup>2</sup> and 1.3346,<sup>3</sup> respectively. The sample and the reference were excited at 450 nm. Results are presented as an average of 2 or 3 independent measurements.

Table 1. Fluorescence quantum yields

|                                 | $\Phi$ (free) | $\Phi$ ( $Tl^+ = 5$ mM) |
|---------------------------------|---------------|-------------------------|
| Thallos                         | 0.04          | 0.11                    |
| <b>ION Thallos-HTL</b>          | 0.03          | 0.11                    |
| HaloTag- <b>ION Thallos-HTL</b> | 0.09          | 0.21                    |
| <b>ION Thallos-HTL*</b>         | 0.04          | -                       |

\*in the presence of BSA

**Metal ion selectivity.** To evaluate the metal ion selectivity, the fluorescence intensity of 3  $\mu$ M freshly prepared hydrolyzed **ION Thallos-HTL** in 10 mM Tris HCl buffer pH 7.45 ( $I = 140$  mM TMAcI) was measured in the presence of  $Na^+$  and  $K^+$  at room temperature. Stock solution of 500 mM NaCl and 500 mM KCl were used to achieve solutions with final concentrations of 1 mM and 140 mM. A negative control experiment in the absence of metal (blank) and positive control in the presence of 1 mM and 4.5 mM  $Tl^+$  were also included.

In the case of divalent ions, freshly hydrolyzed **ION Thallos-HTL** was diluted to a concentration of 3  $\mu$ M in buffer containing 10 mM MOPS, 10 mM EGTA, and 100 mM KCl, pH 7.28. To achieve the desired concentrations of free  $Ca^{2+}$  and  $Mg^{2+}$  in metal buffered solutions we used MaxChelator,<sup>4</sup> an open-source software that calculates the concentration of free  $Ca^{2+}$  and  $Mg^{2+}$  in the presence of metal buffers.<sup>5</sup> We used 10 mM EGTA,  $I = 0.1$  N, temperature = 25 °C and pH 7.28 in the calculations. The amounts of  $CaCl_2$  and  $MgCl_2$  calculated with MaxChelator were added to the buffered solutions to generate the desired free metal concentrations of 1  $\mu$ M and 40  $\mu$ M for  $Ca^{2+}$  and 1 mM and 10 mM for  $Mg^{2+}$ . Fluorescence was recorded using  $\lambda_{ex} = 490$  nm,  $\lambda_{em} = 515$  nm, and bandwidth = 9 nm.

**Fluorescence titrations.** Freshly prepared hydrolyzed stock solutions (Thallos or **ION Thallos-HTL**) were diluted to a final concentration of 3  $\mu$ M in 500  $\mu$ L of a high thallium (5.5 mM  $Tl_2SO_4$  or 11 mM  $Tl^+$ ) and 1500  $\mu$ L of low thallium (0 mM  $Tl_2SO_4$ ) sodium gluconate buffer pH 7.3. Thallium concentrations (0 mM, 0.02 mM, 0.04 mM, 0.09 mM, 0.17 mM, 0.34 mM, 0.69 mM, 1.38 mM, 2.75 mM, 5.50 mM, 11.00 mM) were obtained through a serial dilution using the high and low thallium solutions in a clear 96-well plate (VWR). Fluorescence intensities were measured using a plate reader. Spectra were recorded using  $\lambda_{ex} = 490$  nm,  $\lambda_{em} = 515$  nm, and

bandwidth = 9 nm. Fold change was calculated by dividing the fluorescence values by the fluorescence in the 0 mM Tl<sup>+</sup> group. K<sub>d</sub> values were determined using a fit for binding-saturation with one site-total.

**Fluorescence titrations in the presence and absence of HaloTag.** Freshly prepared hydrolyzed **ION Thallos-HTL** was diluted in sodium gluconate buffer containing 0.1% CHAPS to a concentration of 500 nM. Then, HaloTag protein was added to this solution to give a final concentration of 500 nM for the sensor and 750 nM of protein. This solution was incubated at RT for 30 min. After the incubation, solution was split into two vials. 50 mM Tl<sub>2</sub>SO<sub>4</sub> solution was added to make 400 μL of a high thallium (11 mM Tl<sup>+</sup>) solution in one vial. An equal volume of water was added to the remaining vial to make the low thallium (0 mM Tl<sup>+</sup>) solution. In a 384-well plate (VWR) a serial dilution was done to obtain thallium concentrations of 0 mM, 0.02 mM, 0.04 mM, 0.09 mM, 0.17 mM, 0.34 mM, 0.69 mM, 1.38 mM, 2.75 mM, 5.50 mM, and 11.00 mM. Fluorescence intensities were measured using a plate reader. Spectra were recorded using  $\lambda_{\text{ex}} = 490$  nm,  $\lambda_{\text{em}} = 515$  nm, and bandwidth = 9 nm.

### **Stable cell line generation**

Stable HaloTag(+) HEK-293 cells were generated from commercially available cells (HEK-293 CRL-1573<sup>TM</sup>, ATTC). HEK-293 cells were seeded in a clear 6-well plate (VWR). Plasmid encoding pHTN HaloTag CMV-neo Vector was transfected into HEK-293 cells using Lipofectamine 2000 transfection reagent (Fisher Scientific) following the manufacture's protocol. Approximately 24 h-post transfection, the cells were passaged and seeded into a T-75 flask (VWR). Selection was performed using 400 μg/mL G418 disulfate (Sigma Aldrich). After a week of selection, cells were seeded at a target of 0.5 cell/well in a 96-well plate (VWR) and incubated for a week and a half. Screening for cells with high expression of HaloTag protein was done with HaloTag® TMR ligand (Promega). A clonal population with high HaloTag expression was selected for continued expansion.

## Syntheses and characterization

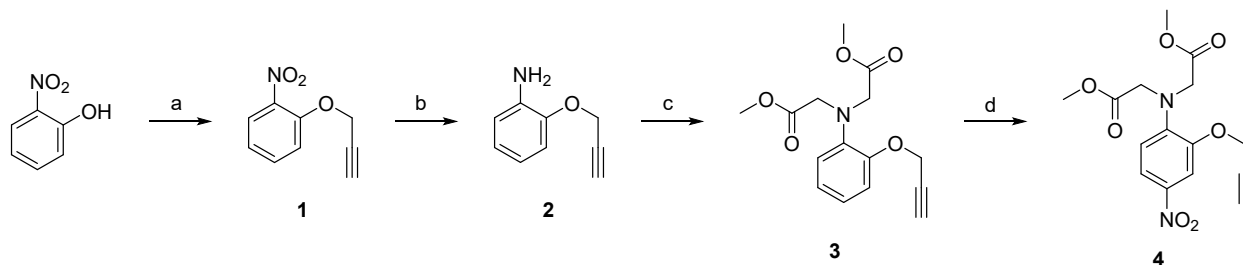

Scheme S1. Synthesis of **compound 4**. Reagents and conditions: a) (1)  $\text{K}_2\text{CO}_3$ , DMF, RT, 15 min; (2) propargyl bromide, 65 °C, 1 h, 99% crude; b) tin, 6 M HCl, EtOH, reflux, 2.5 h; c) methyl 2-bromoacetate, proton sponge, NaI,  $\text{CH}_3\text{CN}$ , 95 °C, overnight, 77%; d) glacial acetic acid, 70%  $\text{HNO}_3$ , 0-5 °C, 30 min, 58%.

**Compound 1.** To a round bottom flask were added 2-nitrophenol (1.000 g, 7.19 mmol, 1.0 eq.), dry DMF (10 mL) and potassium carbonate (1.987 g, 0.01 mol, 2.0 eq.). Then, the resulting mixture was stirred at RT for 15 min. Next, propargyl bromide (1.02 mL, 9.35 mmol, 1.3 eq.) was added and the mixture was stirred at 65 °C for 1 h. Upon cooling to RT, the crude mixture was diluted with EtOAc and the heterogenous mixture was decanted. The solution was put into a separatory funnel and washed with water. The aqueous phase was back extracted with EtOAc and the combined organic layers were washed with brine. The organic phase was then dried over  $\text{Na}_2\text{SO}_4$ , filtered, and concentrated in vacuo to give a yellow solid, 1.260 g (99% crude yield).  $^1\text{H}$  NMR ( $\text{CDCl}_3$ , 400 MHz)  $\delta$  7.86 (dd,  $J = 8.0, 1.6$  Hz, 1H), 7.56 (td,  $J = 7.6, 1.6$  Hz, 1H), 7.26 (d,  $J = 8.4$  Hz, 1H), 7.13-7.06 (m, 1H), 4.85 (d,  $J = 2.4$  Hz, 2H), 2.58 (t,  $J = 2.4$  Hz, 1H).

**Compound 2.** To a solution of **compound 1** (1.255 g, 7.08 mmol, 1.0 eq.) in EtOH (38 mL) were added 6 M HCl (12 mL, 0.07 mol, 10.0 eq.) and tin (1.892 g, 0.02 mol, 2.3 eq.). The resulting heterogenous mixture was then stirred at reflux for 2.5 h. After cooling to RT, the crude mixture was poured into icy water and the pH was adjusted to around 9 by adding aqueous 6 M KOH. The mixture was extracted three times with  $\text{CHCl}_3$ . The combined organic layers were dried over  $\text{Na}_2\text{SO}_4$ , filtered, and concentrated in vacuo. Analysis of the crude mixture by LCMS showed the desired compound constituted 75% of the mass. The crude mixture was used in the next step without any purification.  $^1\text{H}$  NMR ( $\text{CDCl}_3$ , 400 MHz)  $\delta$  6.92 (dd,  $J = 8.0, 1.2$  Hz, 1H),

6.84 (td,  $J = 7.6, 1.2$  Hz, 1H), 6.76-6.71 (m, 2H), 4.72 (d,  $J = 2.4$  Hz, 2H), 3.81 (bs, 2H), 2.52 (t,  $J = 2.4$  Hz, 1H).

**Compound 3.** **Compound 2** (0.400 g, 2.72 mmol, 1.0 eq.), proton sponge (1.514 g, 7.07 mmol, 2.6 eq.) and NaI (0.306 g, 2.04 mmol, 0.8 eq.) were added to a heavy wall pressure vessel. Then, dry CH<sub>3</sub>CN (2 mL) and methyl 2-bromoacetate (0.77 mL, 8.15 mmol, 3.0 eq.) were added and the reaction mixture was stirred overnight at 95 °C. After cooling to RT, the crude mixture was diluted with CH<sub>3</sub>CN and filtered off. The filtrate was concentrated in vacuo. Then, the residue was dissolved with a mixture of CHCl<sub>3</sub> and MeOH, adsorbed on silica and chromatographed (SiO<sub>2</sub>, 2:1 Hex:EtOAc). **Compound 3** was recovered as pale orange oil, 0.612 g (77% isolated yield). <sup>1</sup>H NMR (CDCl<sub>3</sub>, 400 MHz)  $\delta$  6.99-6.86 (m, 4H), 4.70 (d,  $J = 2.4$  Hz, 2H), 4.16 (s, 4H), 3.73 (s, 6H), 2.49 (t,  $J = 2.4$  Hz, 1H).

**Compound 4.** To a vial containing **compound 3** (0.390 g, 1.34 mmol, 1.0 eq.) was added glacial acetic acid (58  $\mu$ L, 1.00 mmol, 0.8 eq.). Then, the mixture was cooled down in an ice bath and 70% nitric acid (64  $\mu$ L, 1.00 mmol, 0.8 eq.) was added dropwise. The reaction mixture was stirred at 0-5 °C for 30 min. Next, the crude mixture was diluted with EtOAc and washed with saturated NaHCO<sub>3</sub> aqueous solution. The organic layer was dried over Na<sub>2</sub>SO<sub>4</sub>, filtered, and concentrated in vacuo. Analysis by LCMS showed 46% conversion. The residue was subjected to react again under the same reaction conditions adjusting for the remaining mass of starting material (35  $\mu$ L CH<sub>3</sub>COOH and 52  $\mu$ L HNO<sub>3</sub>). After working up the reaction as before, the residue was dissolved with CHCl<sub>3</sub>, adsorbed on silica and chromatographed (SiO<sub>2</sub>, 2:1 Hex:EtOAc) to give a yellow solid (0.262 g, 58% isolated yield). <sup>1</sup>H NMR (CDCl<sub>3</sub>, 600 MHz)  $\delta$  7.86 (dd,  $J = 9.0, 2.4$  Hz, 1 H), 7.83 (dd,  $J = 2.4$  Hz, 1 H), 6.70 (d,  $J = 8.4$  Hz, 1H), 4.72 (d,  $J = 2.4$  Hz, 2 H), 4.21 (s, 4 H), 3.79 (s, 6H), 2.57 (t,  $J = 2.4$  Hz, 1H). <sup>13</sup>C NMR (CDCl<sub>3</sub>, 150 MHz)  $\delta$  171.0, 147.3, 145.7, 141.0, 119.2, 116.3, 109.9, 77.2, 76.8, 57.1, 54.3, 52.4. HRMS (ESI) calcd from C<sub>15</sub>H<sub>17</sub>N<sub>2</sub>O<sub>7</sub> [M+H]<sup>+</sup> 337.1030, found 337.1048.

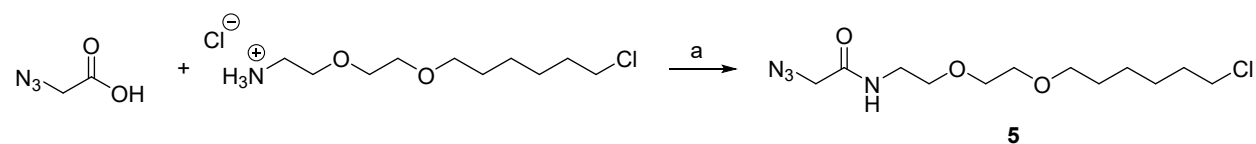

Scheme S2. Synthesis of **compound 5**. Reagents and conditions: a) HATU, DIPEA, DMF, Ar, RT, overnight, 87%.

**Compound 5.** Azidoacetic acid (0.015 g, 0.15 mmol, 1.0 eq.), 2-(2-((6-chlorohexyl)oxy)ethoxy)ethanamine hydrochloride (0.039 g, 0.15 mmol, 1.0 eq.) and HATU (0.057 g, 0.15 mmol, 1.0 eq.) were added to a Schlenk flask. The flask was placed under high vacuum, followed by backfilling with Ar. Next, dry DMF (4 mL) and DIPEA (0.12 mL, 0.67 mmol, 4.5 eq.) were added. The reaction mixture was stirred at RT overnight. The crude mixture was diluted with CHCl<sub>3</sub>, and it was washed with brine twice. The organic layer was dried over Na<sub>2</sub>SO<sub>4</sub>, filtered, and concentrated under reduced pressure. The desired product was purified by reverse phase preparatory HPLC (10-95% CH<sub>3</sub>CN/H<sub>2</sub>O, linear gradient, with constant 0.1% v/v formic acid). A colorless oil was recovered, 0.040 g (87% isolated yield). <sup>1</sup>H NMR (CDCl<sub>3</sub>, 400 MHz) δ 6.73 (bs, 1H), 3.97 (s, 2H), 3.65-3.60 (m, 2H), 3.60-3.56 (m, 4H), 3.56-3.44 (m, 6H), 1.83-1.73 (m, 2H), 1.66-1.57 (m, 2H), 1.51-1.42 (m, 2H), 1.42-1.33 (m, 2H).

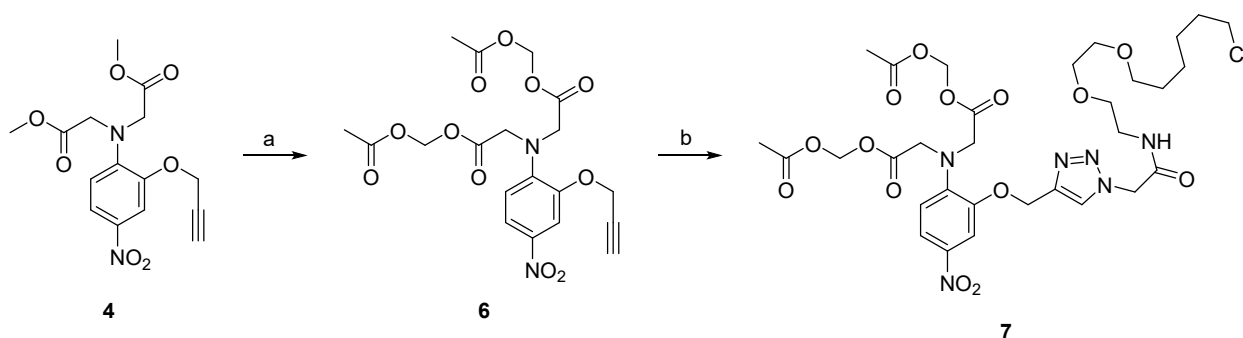

Scheme S3. Synthesis of **compound 7**. Reagents and conditions: a) (1) KOH aq., MeOH:1,4-dioxane 1:1 v/v, RT, overnight; (2) 2 M HCl; (3) bromomethyl acetate, DIPEA, DCM, 0-5 °C to RT, overnight, 65%; b) **compound 5**, CuI, DIPEA, THF, RT, overnight, 81%.

**Compound 6.** To a solution of **compound 4** (0.200 g, 0.60 mmol, 1.0 eq.) in a mixture of MeOH (5 mL) and 1,4-dioxane (5 mL) was added an aqueous solution (5 mL) of KOH (0.334 g, 5.95 mmol, 10.0 eq.). The reaction mixture was stirred at RT overnight. To the crude mixture were added 2 M HCl (7.4 mL) and brine, then the mixture was extracted three times with CHCl<sub>3</sub>. The combined organic layers were dried over Na<sub>2</sub>SO<sub>4</sub>, filtered, and concentrated in vacuo to give a yellow solid, 0.158 g (86% crude yield). The recovered carboxylic acid intermediate (0.158 g, 0.51 mmol, 1.0 eq.) was dissolved in dry DCM (4 mL), then DIPEA (0.63 mL, 3.59 mmol, 7.0 eq.) was added and the solution was cooled to 0-5 °C in an ice bath. Next, bromomethyl acetate

(0.2 mL, 2.05 mmol, 4.0 eq.) was added dropwise, the ice bath was removed, and the reaction mixture was stirred at RT overnight. The crude mixture was diluted with  $\text{CHCl}_3$  and washed with brine. The organic phase was dried over  $\text{Na}_2\text{SO}_4$ , filtered, and concentrated under reduced pressure. The residue was dissolved in  $\text{CHCl}_3$  and applied to 3 preparatory TLC plates, resolving with a 1:1 Hex:EtOAc mixture. **Compound 6** was obtained as a yellow solid (0.150 g, 65% isolated yield).  $^1\text{H}$  NMR ( $\text{CDCl}_3$ , 400 MHz)  $\delta$  7.88-7.83 (m, 2H), 6.72-6.67 (m, 1H), 5.83 (s, 4H), 4.75 (d,  $J = 2.4$  Hz, 2H), 4.24 (s, 4H), 2.59 (t,  $J = 2.4$  Hz, 1H), 2.14 (s, 6H).  $^{13}\text{C}$  NMR ( $\text{CDCl}_3$ , 150 MHz)  $\delta$  169.6, 169.4, 147.5, 145.1, 141.5, 119.0, 116.6, 109.8, 79.8, 77.4, 77.1, 57.1, 54.1, 20.9. HRMS (ESI) calcd from  $\text{C}_{19}\text{H}_{21}\text{N}_2\text{O}_{11}$   $[\text{M}+\text{H}]^+$  453.1140, found 453.1157.

**Compound 7.** **Compound 6** (0.090 g, 0.20 mmol, 1.0 eq.), **compound 5** (0.122 g, 0.40 mmol, 2.0 eq.) and  $\text{CuI}$  (0.004 g, 0.02 mmol, 0.1 eq.) were added to a Schlenk flask. The flask was placed under high vacuum and backfilled with Ar using a balloon. Next, THF (1.8 mL) and DIPEA (0.06 mL, 0.34 mmol, 1.7 eq.) were added. The reaction mixture was stirred at RT overnight. The crude mixture was diluted with  $\text{CHCl}_3$ , and washed with brine twice. The organic layer was dried over  $\text{Na}_2\text{SO}_4$ , filtered, and concentrated under reduced pressure. The residue was dissolved in  $\text{CHCl}_3$  and applied to 3 preparatory TLC plates, resolving with EtOAc. **Compound 7** was obtained as a yellow solid (0.122 g, 81% isolated yield).  $^1\text{H}$  NMR ( $\text{CDCl}_3$ , 600 MHz)  $\delta$  7.89-7.86 (m, 2H), 7.84 (dd,  $J = 8.4, 1.8$  Hz, 1H), 6.73 (t,  $J = 4.8$  Hz, 1H), 6.68 (d,  $J = 8.4$  Hz, 1H), 5.72 (s, 4H), 5.25 (s, 2H), 5.07 (s, 2H), 4.20 (s, 4H), 3.61-3.58 (m, 2H), 3.57-3.51 (m, 6H), 3.49-3.44 (m, 2H), 2.11 (s, 6H), 1.77 (q,  $J = 6.6$  Hz, 2H), 1.61 (q,  $J = 6.6$  Hz, 2H), 1.46 (q,  $J = 7.2$  Hz, 2H), 1.37 (q,  $J = 7.2$  Hz, 2H).  $^{13}\text{C}$  NMR ( $\text{CDCl}_3$ , 150 MHz)  $\delta$  169.7, 169.3, 164.9, 148.3, 145.0, 142.7, 141.6, 125.3, 118.7, 116.6, 109.4, 79.8, 71.4, 70.4, 70.2, 69.3, 62.8, 54.1, 53.1, 45.2, 39.7, 32.6, 29.5, 26.8, 25.5, 20.8. HRMS (ESI) calcd from  $\text{C}_{31}\text{H}_{44}\text{ClN}_6\text{O}_{14}$   $[\text{M}+\text{H}]^+$  759.2599, found 759.2605.



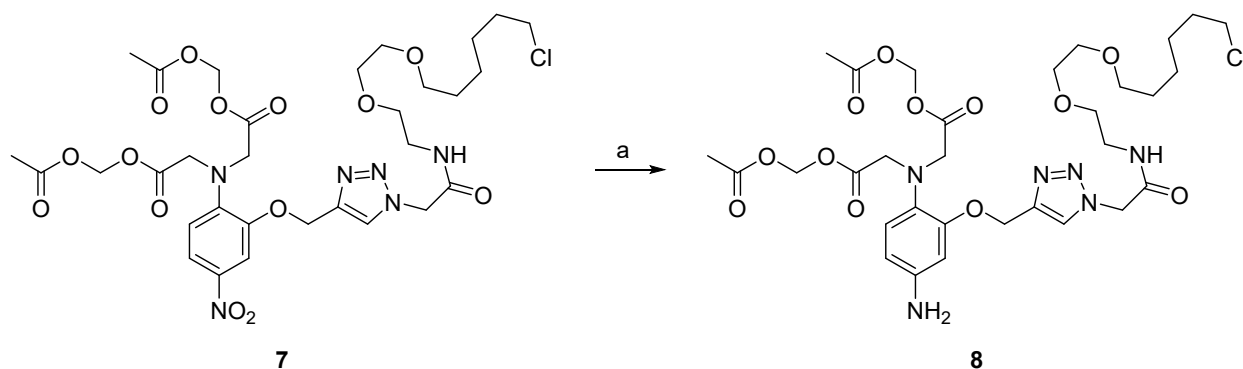

Scheme S4. Synthesis of **compound 8**. Reagents and conditions: a) Pd/C, H<sub>2</sub>, DCM, RT, 2.5 h, quant.

**Compound 8**. To a solution of **compound 7** in dry DCM (8 mL) was added Pd/C. The mixture under stirring, was bubbled with H<sub>2</sub> for 5 min and stirring continued at RT for 2.5 h. The crude mixture was then filtered off through a PTFE syringe filter and the filtrate was concentrated under reduced pressure. Analysis by LCMS showed reaction completion, the product was used in the next step without any purification. <sup>1</sup>H NMR (CDCl<sub>3</sub>, 400 MHz) δ 7.90 (s, 1H), 6.83 (d, *J* = 8.4 Hz, 1H), 6.57 (t, *J* = 4.8 Hz, 1H), 6.34 (d, *J* = 2.4 Hz, 1H), 6.23 (dd, *J* = 8.4, 2.4 Hz, 1H), 5.71 (s, 4H), 5.24 (s, 2H), 5.05 (s, 2H), 4.09 (s, 4H), 3.60-3.57 (m, 2H), 3.56-3.50 (m, 6H), 3.49-3.43 (m, 4H), 2.08 (s, 6H), 1.77 (q, *J* = 6.8 Hz, 2H), 1.60 (q, *J* = 7.2 Hz, 2H), 1.50-1.41 (m, 2H), 1.41-1.24 (m, 2H). <sup>13</sup>C NMR (CDCl<sub>3</sub>, 150 MHz) δ 170.3, 169.8, 165.2, 152.1, 144.8, 143.2, 130.7, 125.1, 123.0, 108.4, 103.0, 79.3, 71.4, 70.5, 70.2, 69.4, 62.9, 54.3, 53.1, 45.2, 39.7, 32.6, 29.5, 26.8, 25.5, 20.8. HRMS (ESI) calcd from C<sub>31</sub>H<sub>46</sub>ClN<sub>6</sub>O<sub>12</sub> [M+H]<sup>+</sup> 729.2857, found 729.2863.

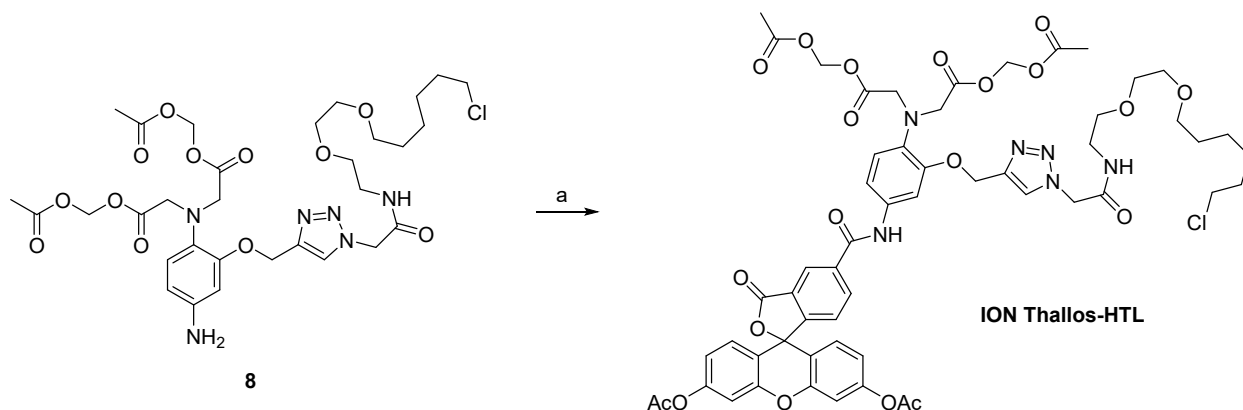

Scheme S5. Synthesis of **ION Thallos-HTL**. Reagents and conditions: a) 5-carboxyfluorescein diacetate, HATU, DIPEA, DMF, Ar, 37%.

**ION Thallos-HTL. Compound 8** (0.053 g, 0.07 mmol, 1.0 eq.), 5-carboxyfluorescein diacetate (0.034 g, 0.07 mmol, 1.0 eq.) and HATU (0.028, 0.07 mmol, 1.0 eq.) were placed in a Schlenk flask. The flask was put under high vacuum and then backfilled with Ar. Next, dry DMF (4 mL) and DIPEA (50  $\mu$ L, 0.26 mmol, 3.5 eq.) were added and the reaction mixture was stirred at RT overnight. The crude mixture was diluted with  $\text{CHCl}_3$  and washed with brine two times. The organic layer was dried over  $\text{Na}_2\text{SO}_4$ , filtered, and concentrated under reduced pressure. The desired product was purified by reverse phase preparatory HPLC (10-95%  $\text{CH}_3\text{CN}/\text{H}_2\text{O}$ , linear gradient). **ION Thallos-HTL** was recovered as a white solid (0.032 g, 37% isolated yield).  $^1\text{H}$  NMR ( $\text{CDCl}_3$ , 600 MHz)  $\delta$  8.70 (s, 1H), 8.57 (s, 1H), 8.30 (d,  $J = 8.4$  Hz, 1H), 7.84 (s, 1H), 7.36-7.32 (m, 1H), 7.29 (d,  $J = 7.8$  Hz, 1H), 7.18 (s, 1H), 7.11 (d,  $J = 1.8$  Hz, 1H), 6.88 (d,  $J = 9.0$  Hz, 1H), 6.85-6.78 (m, 4H), 6.59 (t,  $J = 5.4$  Hz, 1H), 5.73 (s, 4H), 5.24 (s, 2H), 5.03 (s, 2H), 4.18 (s, 4H), 3.60-3.54 (m, 4H), 3.52-3.43 (m, 6H), 3.41-3.37 (m, 2H), 2.32 (s, 6H), 2.09 (s, 6H), 1.73 (q,  $J = 6.6$  Hz, 2H), 1.56 (q,  $J = 7.2$  Hz, 2H), 1.41 (q,  $J = 7.2$  Hz, 2H), 1.33 (q,  $J = 7.2$  Hz, 2H).  $^{13}\text{C}$  NMR ( $\text{CDCl}_3$ , 150 MHz)  $\delta$  170.1, 169.7, 169.0, 168.5, 165.3, 163.8, 155.4, 152.4, 151.7, 149.9, 144.0, 137.5, 136.1, 135.4, 133.3, 128.9, 126.6, 125.6, 124.8, 123.8, 120.3, 118.1, 115.8, 114.7, 110.7, 109.2, 82.2, 79.4, 71.5, 70.4, 70.1, 69.3, 62.5, 53.9, 52.9, 45.2, 39.6, 32.6, 29.5, 26.8, 25.5, 21.3, 20.9. HRMS (ESI) calcd from  $\text{C}_{56}\text{H}_{60}\text{ClN}_6\text{O}_{20}$   $[\text{M}+\text{H}]^+$  1171.3545, found 1171.3552.

## Metal ion selectivity

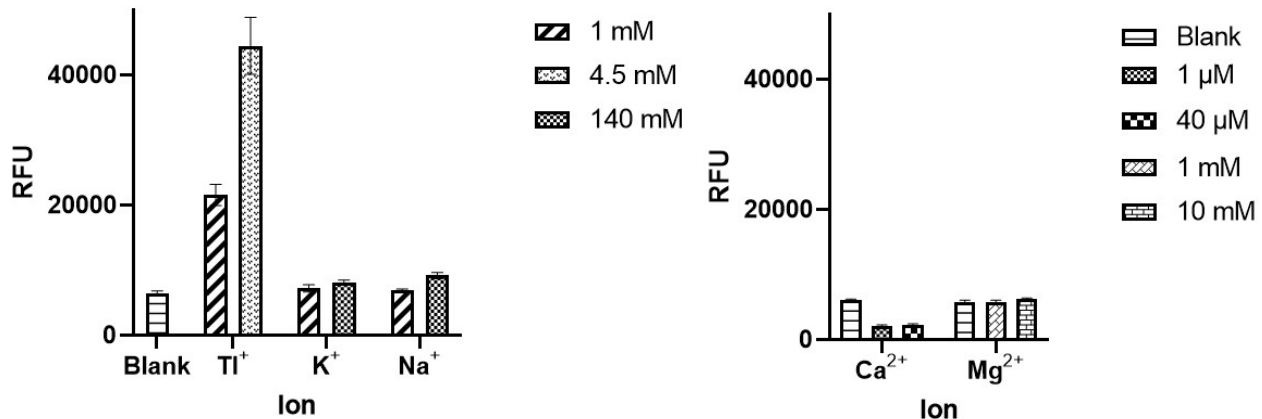

Figure S1. Fluorescence intensity responses of **ION Thallos-HTL** ( $3 \mu\text{M}$ ,  $\lambda_{\text{ex}} = 490 \text{ nm}$ ,  $\lambda_{\text{em}} = 515 \text{ nm}$ ) to various metals. Left, monovalent cations in 10 mM Tris HCl buffer pH 7.45; right, divalent cations in 10 mM MOPS, 10 mM EGTA, 100 mM KCl pH 7.28.

## Emission spectra and fluorescence traces

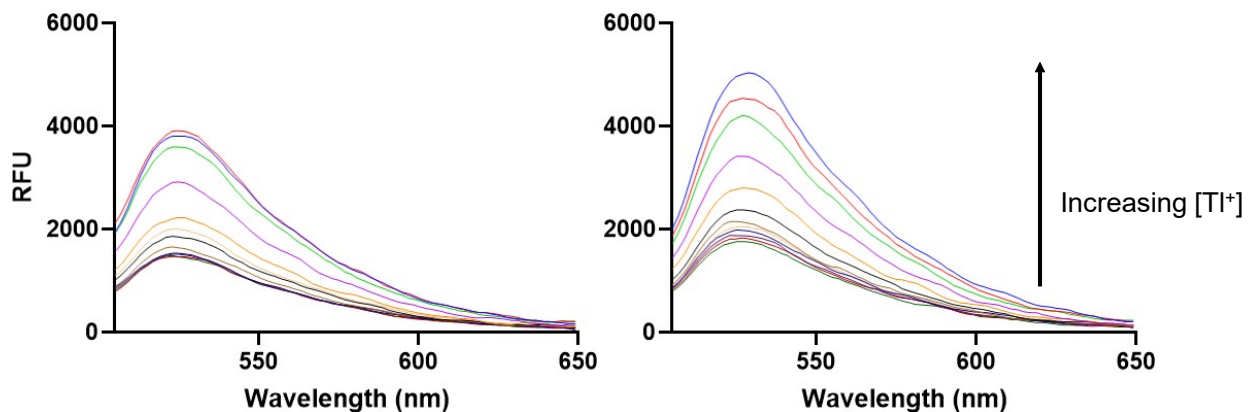

Figure S2. Emission spectra of **ION Thallos-HTL** free (500 nM) (left) and HaloTag bound (right) in the presence of thallium (0-2.25 mM  $Tl_2SO_4$ ) in PBS, pH 7.4.

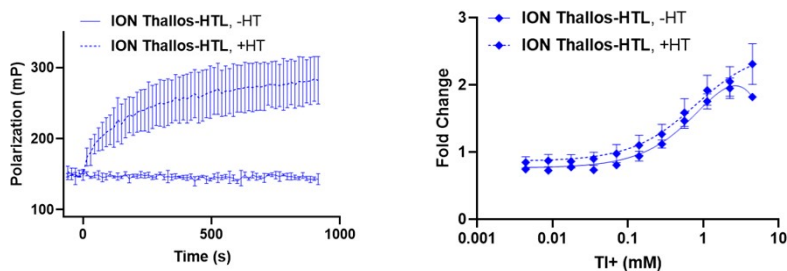

Figure S3. Fluorescence polarization traces of **ION Thallos-HTL** (500  $\mu$ M) in the presence and absence of HaloTag (750 mM) in PBS, pH 7.4 containing 0.01% CHAPS (left). Fluorescence intensity fold change as a function of thallium (0-2.25 mM  $Tl_2SO_4$ ) of ION Thallos-HTL free and HaloTag bound in PBS, pH 7.4.

## Fluorescence images

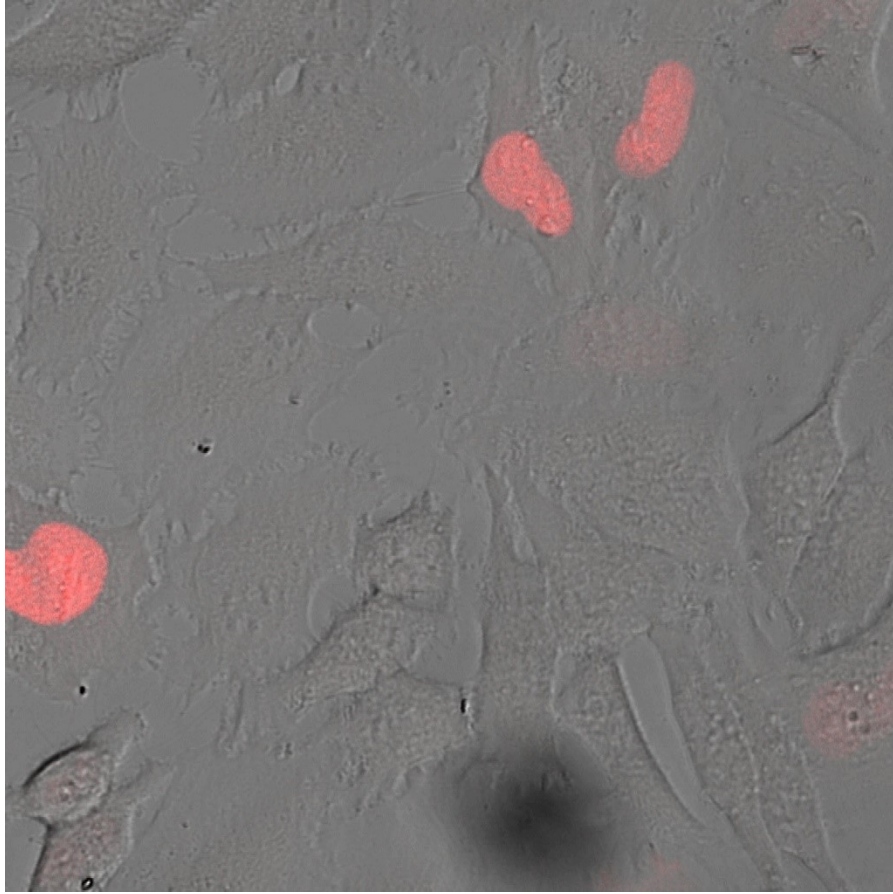

Figure S4. Image of HeLa cells transiently expressing HaloTag-NLS and labeled with Janelia Fluor 585 HaloTag ligand. Merged image of the bright field and fluorescence channel in false color.

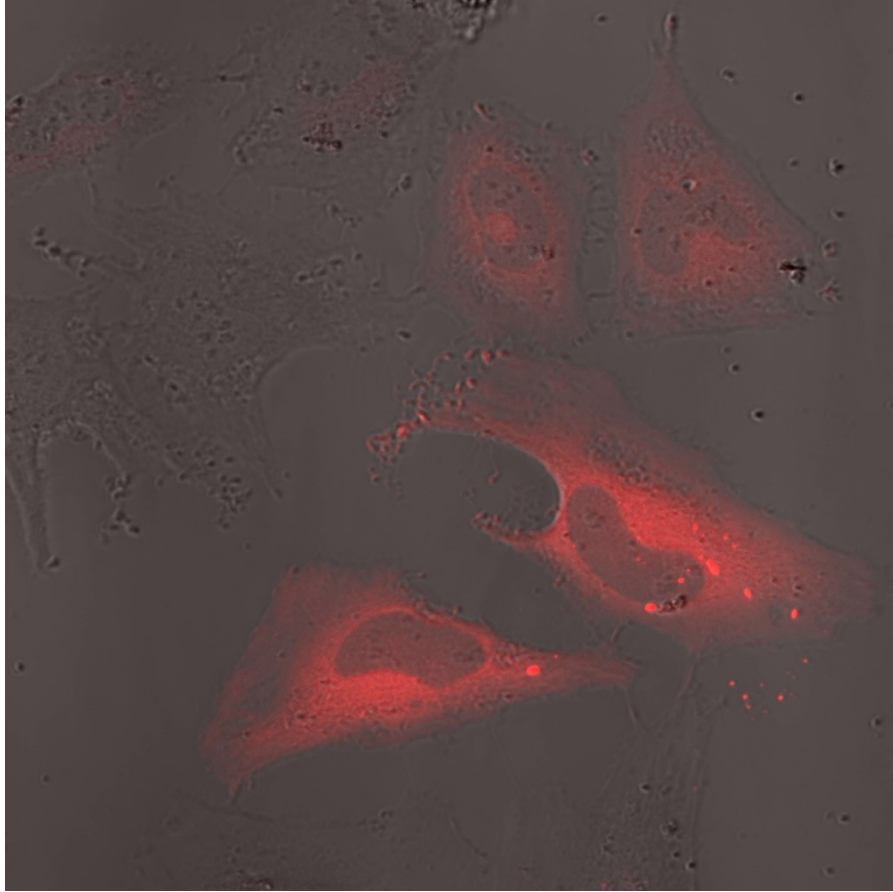

Figure S5. Image of HeLa cells transiently expressing HaloTag-NES and labeled with Janelia Fluor 585 HaloTag ligand. Merged image of the bright field and fluorescence channel in false color.

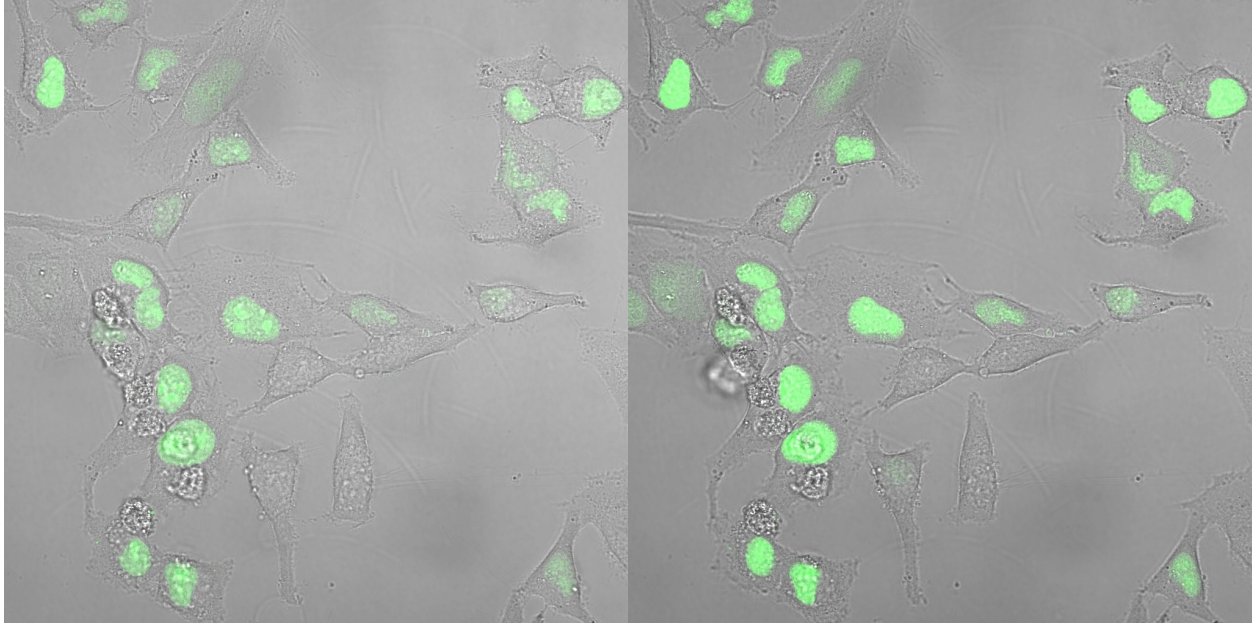

Figure S6. Images of HeLa cells transiently expressing HaloTag-NLS and labeled with **ION Thallos-HTL**. Basal fluorescence (left) and fluorescence after the addition of 0.84 mM Tl<sub>2</sub>SO<sub>4</sub>. Calculated 1.4-fold increment in fluorescence intensity as mean fluorescence of 16 individual cells. Merged images of the bright field and fluorescence channel in false color.

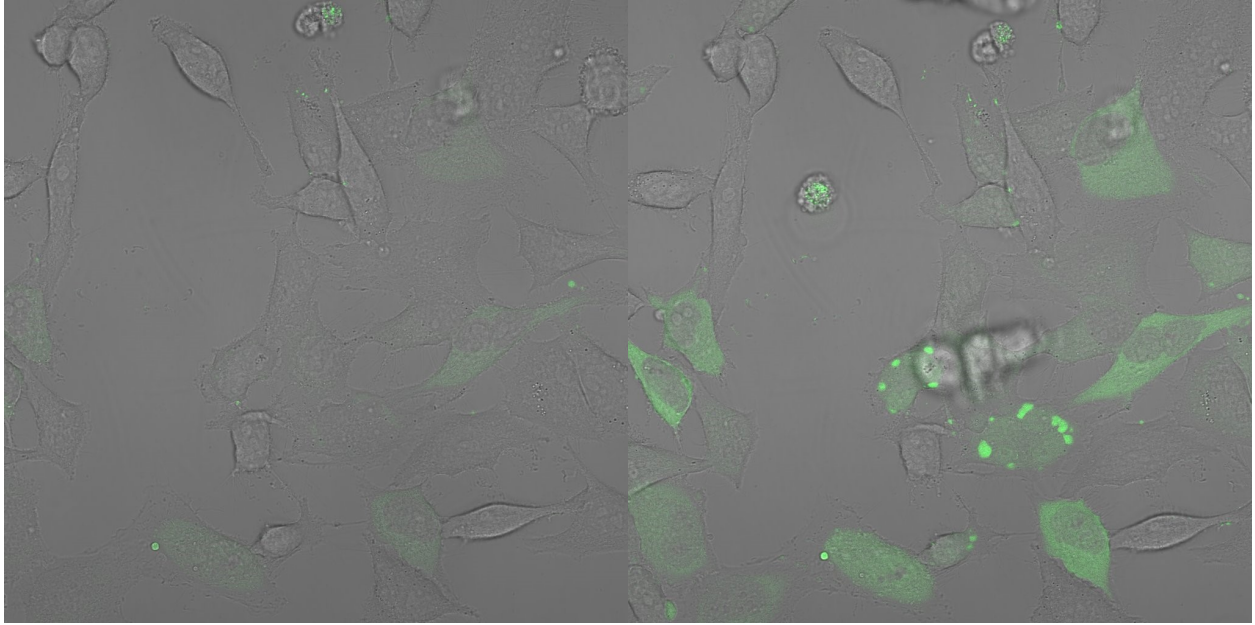

Figure S7. Images of HeLa cells transiently expressing HaloTag-NES and labeled with **ION Thallos-HTL**. Basal fluorescence (left) and fluorescence after the addition of 0.84 mM  $Tl_2SO_4$ . Calculated 1.6-fold increment in fluorescence intensity as mean fluorescence of 16 individual cells. Merged images of the bright field and fluorescence channel in false color.



## Fluorescence signal quantifications

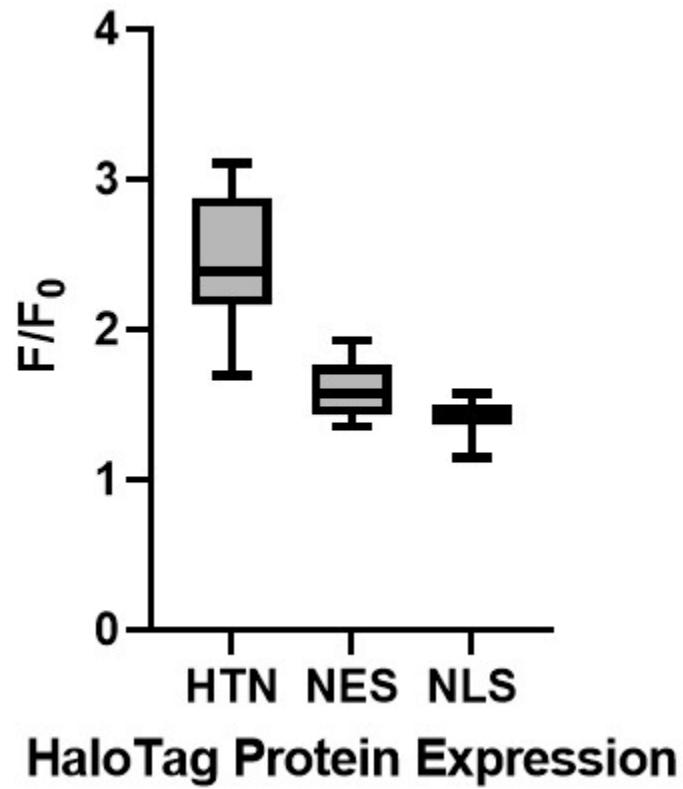

Figure S8. Ratio of the fluorescence intensities at the region of interest after addition of  $Tl^+$  ( $F$ ) over before addition ( $F_0$ ). Box and whiskers plot with center lines showing the mean for 16 cells. Box delimits the 25<sup>th</sup> and 75<sup>th</sup> percentiles and the whiskers show the max and min values.

## High-throughput screening (HTS) data

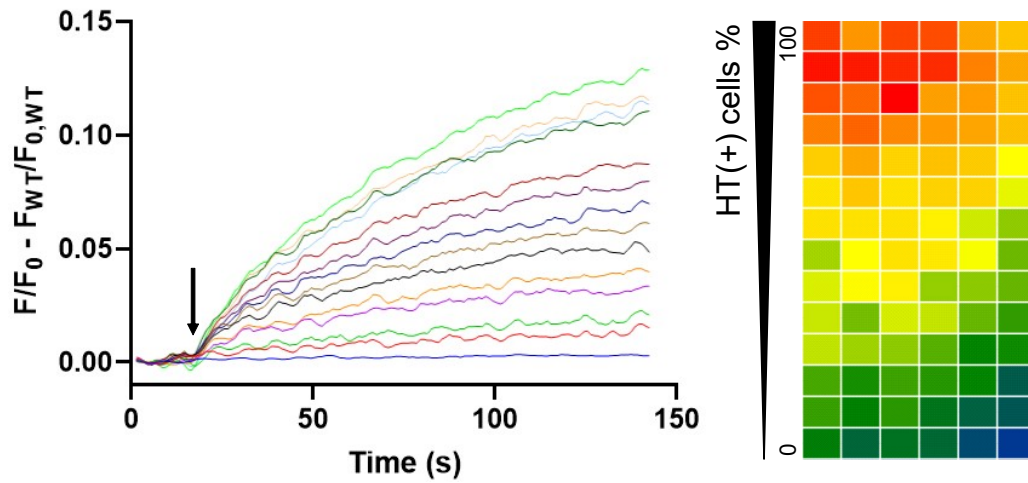

Figure S9. HaloTag (+) cell percentage-dependent fluorescence intensity. Traces from a  $Tl^+$  flux assay in a mixed population of HT(+) HEK-293 cells and WT HEK-293 (0-100%) labeled with **ION Thallos-HTL**. The arrow indicates the time of addition of 0.84 mM  $Tl_2SO_4$ . Slope of kinetic traces after the addition of  $Tl^+$  is displayed as a heat map [low slope (green-blue) and larger slope (red-orange)].

Copies of  $^1\text{H}$  and  $^{13}\text{C}$  NMR spectra

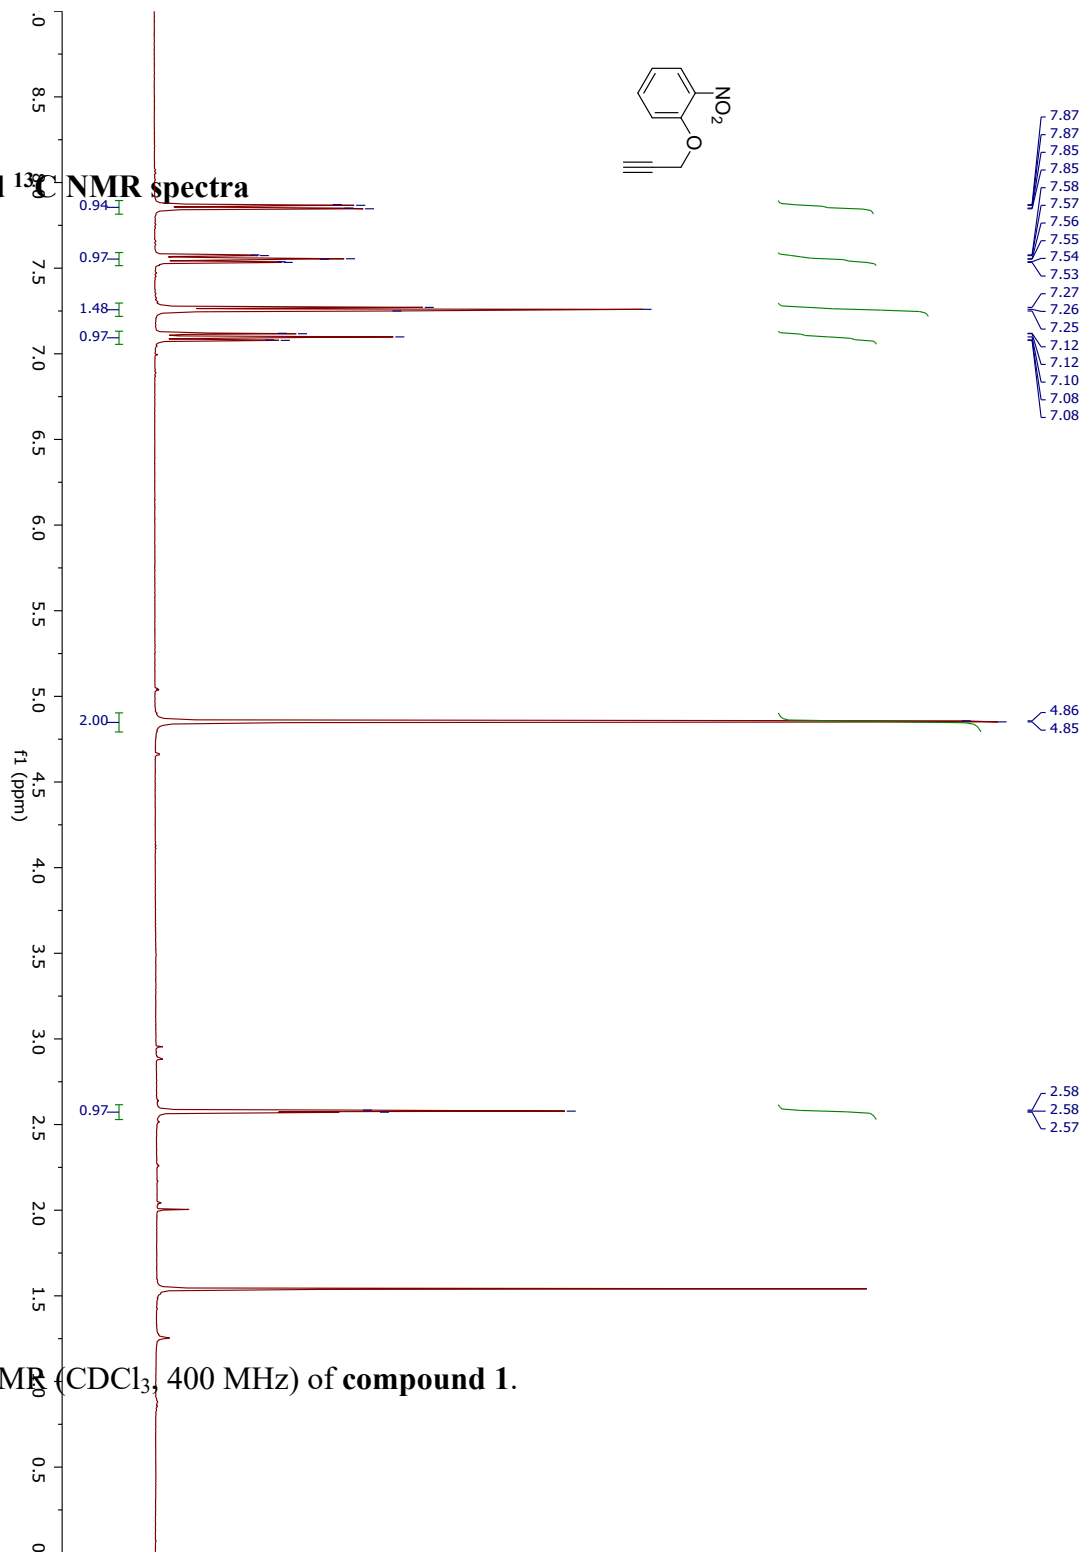

Figure S10.  $^1\text{H}$  NMR ( $\text{CDCl}_3$ , 400 MHz) of **compound 1**.

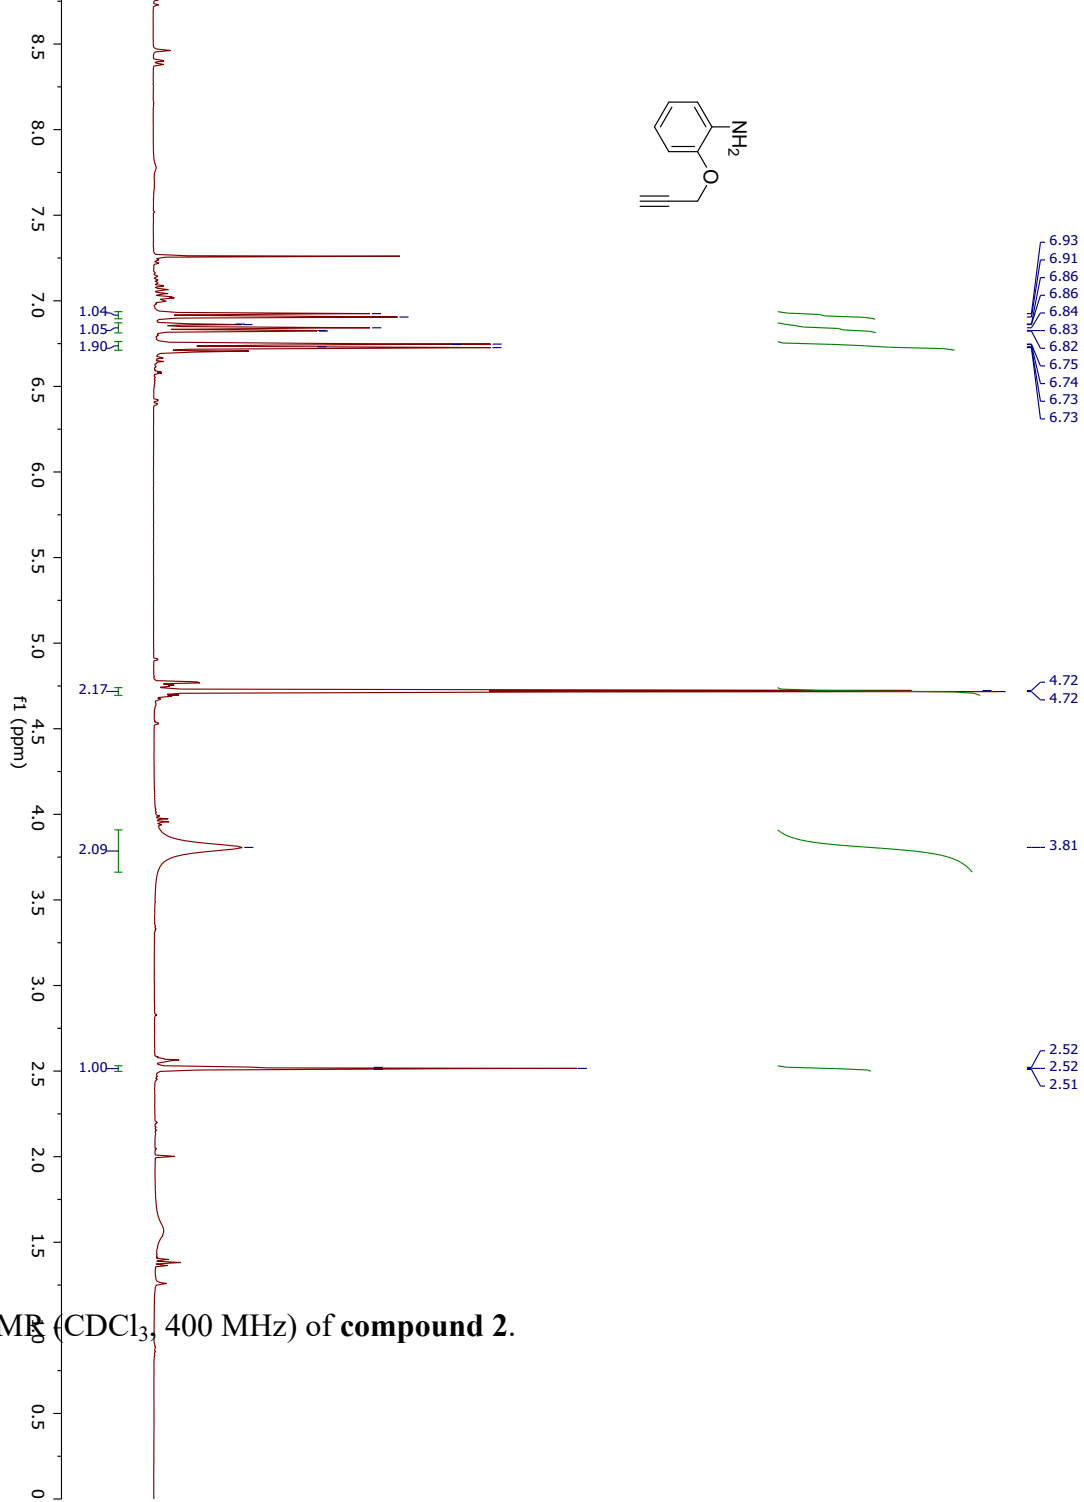

Figure S11.  $^1\text{H NMR}$  (CDCl<sub>3</sub>, 400 MHz) of compound 2.

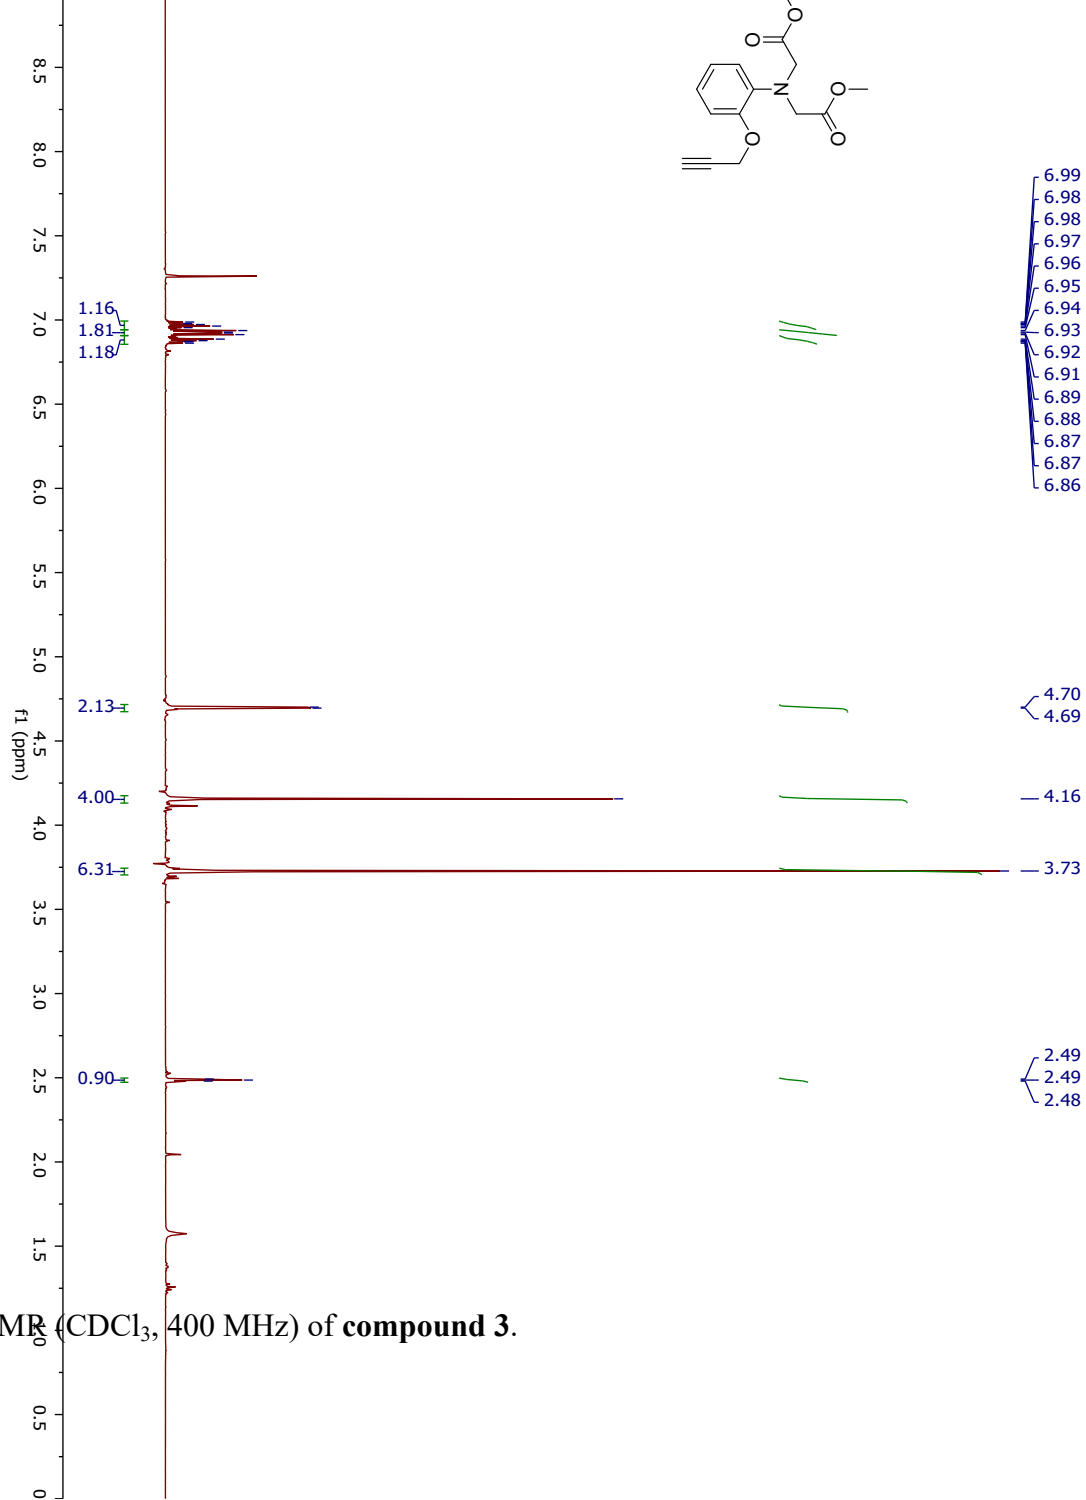

Figure S12.  $^1\text{H}$  NMR (CDCl<sub>3</sub>, 400 MHz) of **compound 3**.

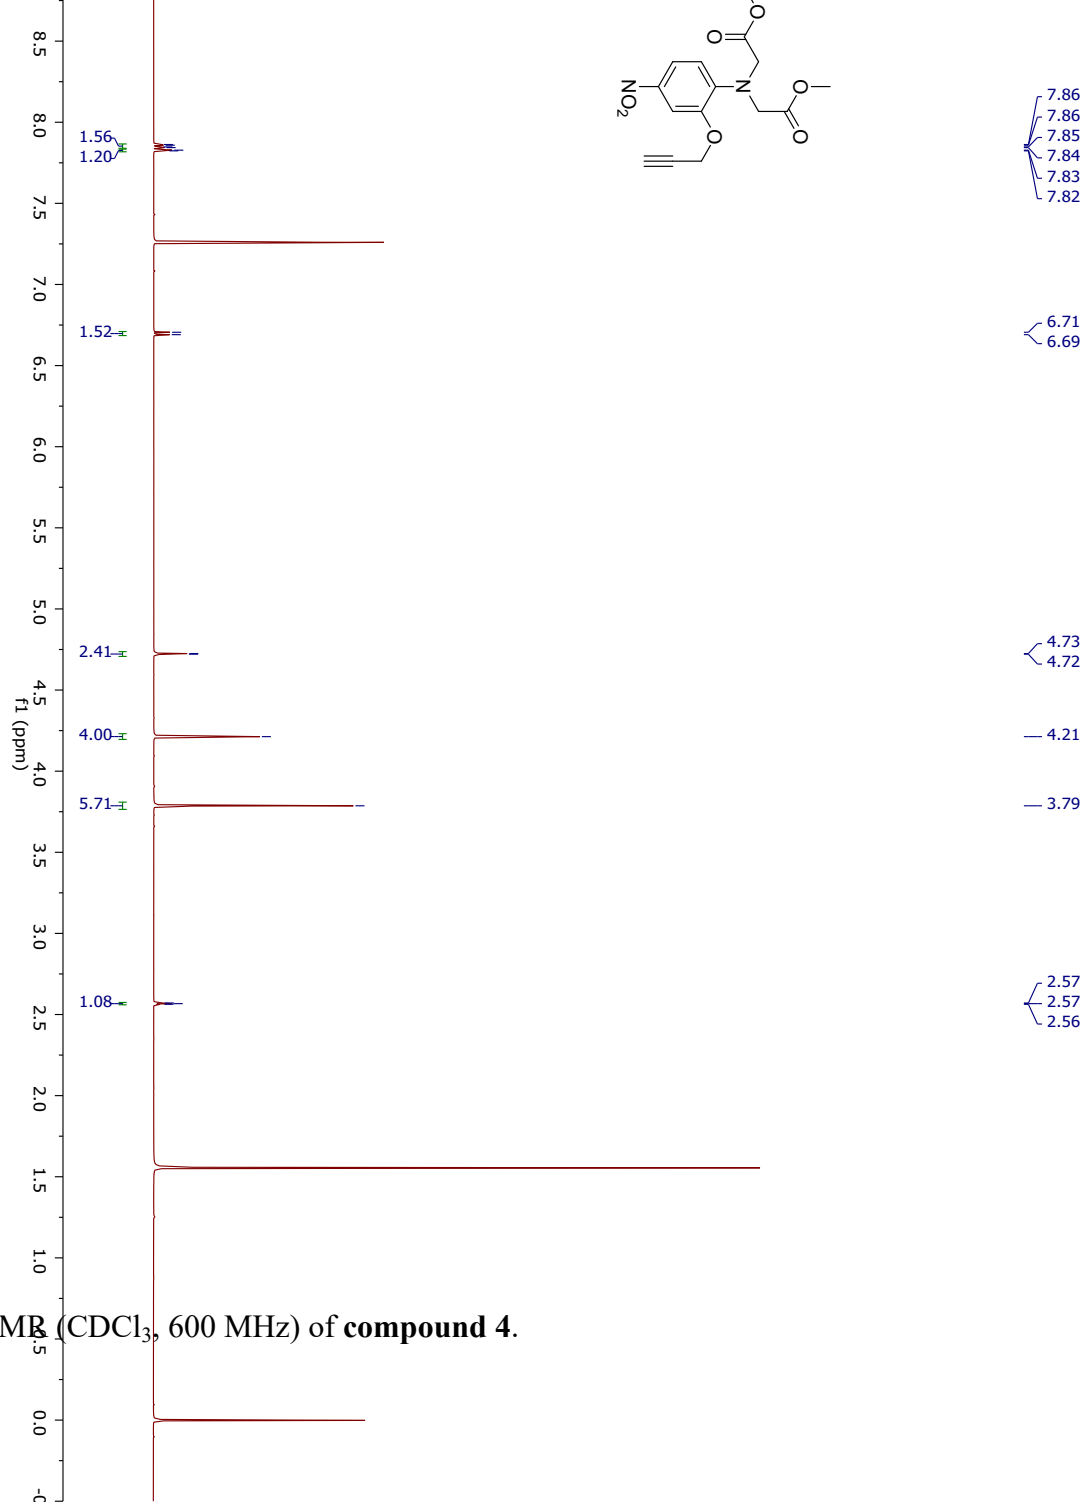

Figure S13.  $^1\text{H NMR}$  (CDCl<sub>3</sub>, 600 MHz) of **compound 4**.

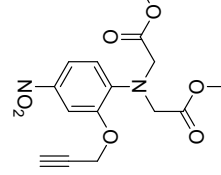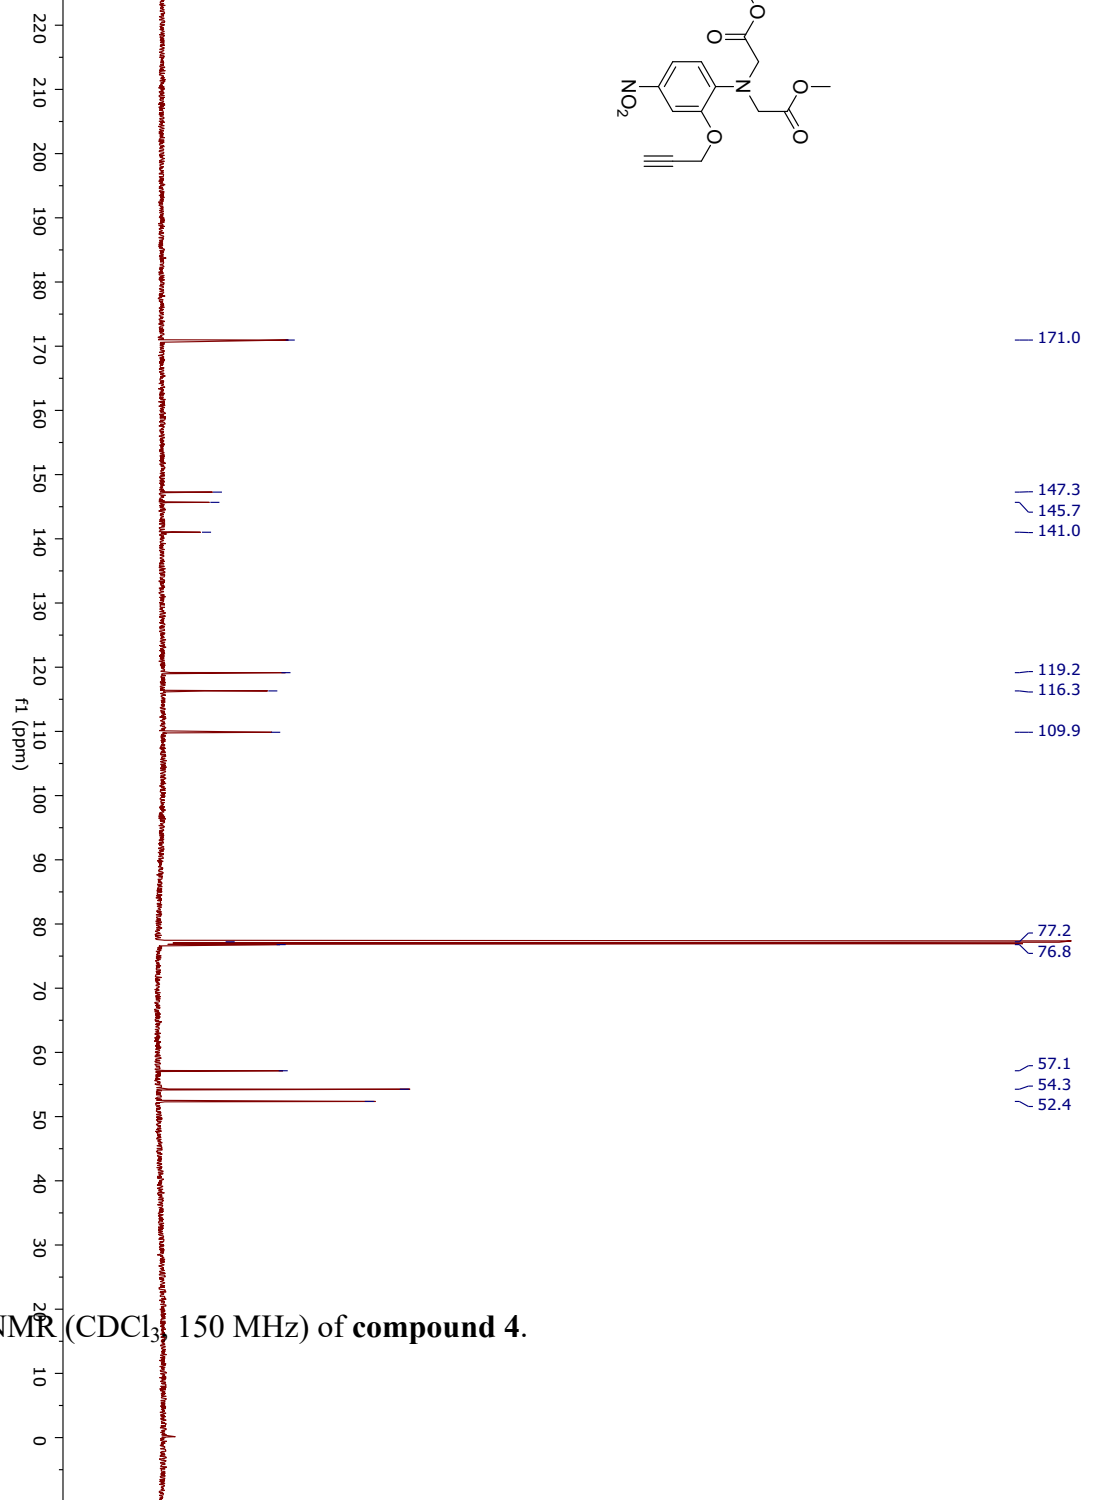

Figure S14.  $^{13}\text{C}$  NMR (CDCl<sub>3</sub>, 150 MHz) of **compound 4**.

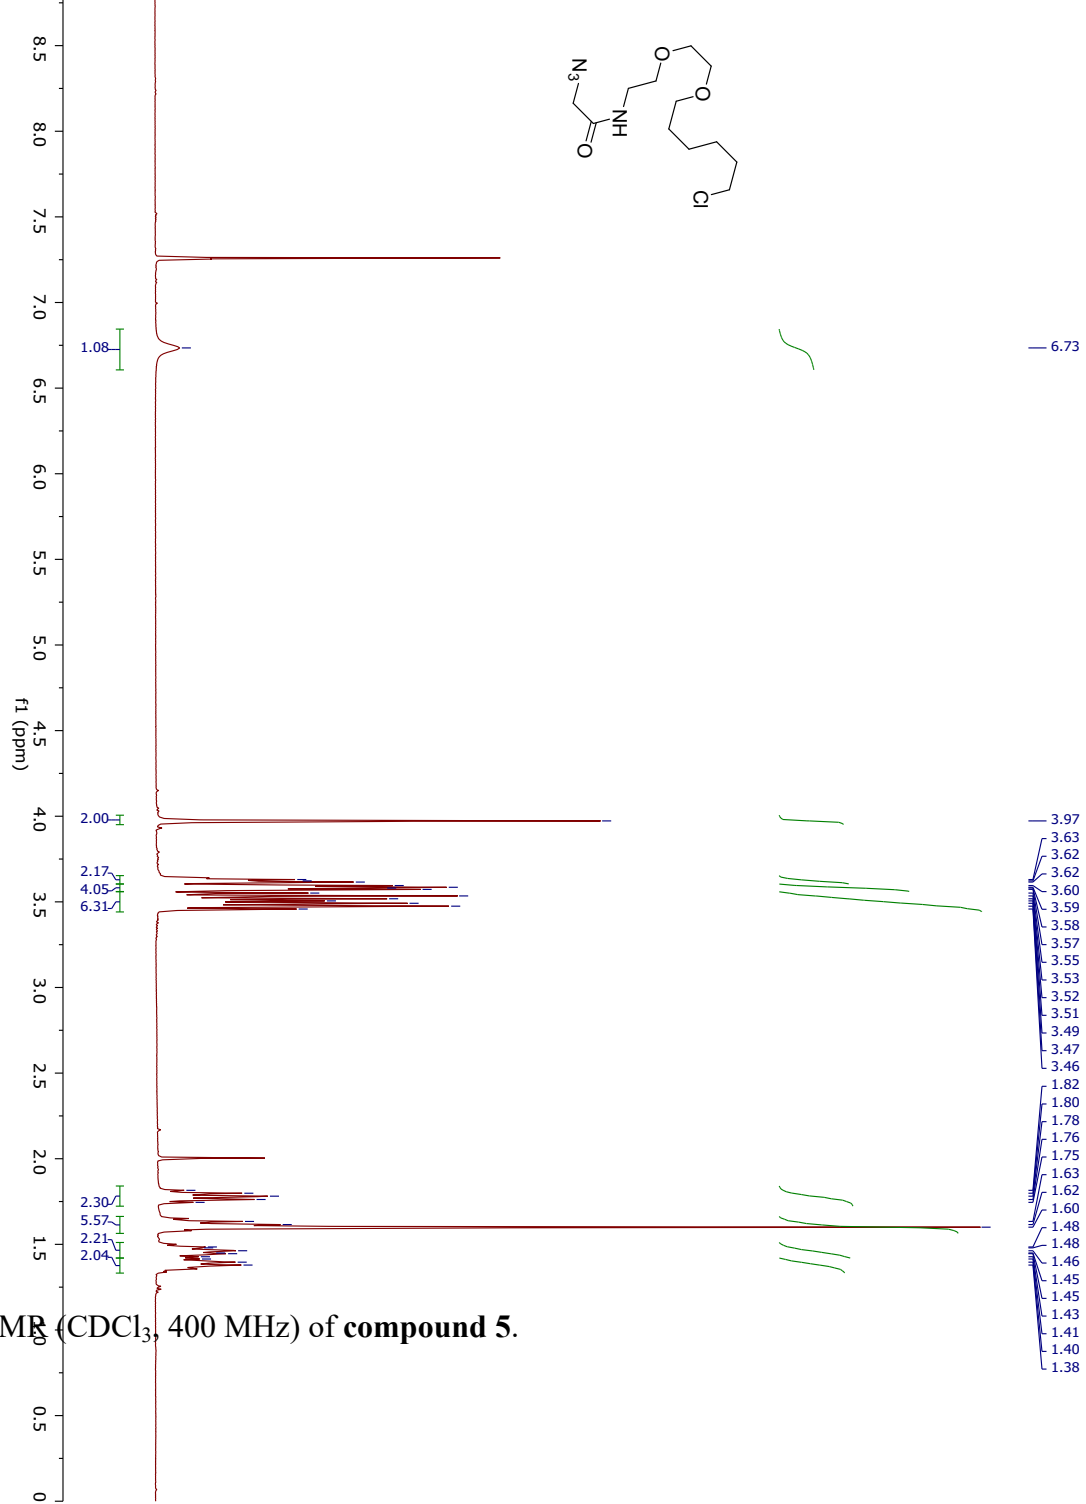

Figure S15.  $^1\text{H NMR}$  (CDCl<sub>3</sub>, 400 MHz) of compound 5.



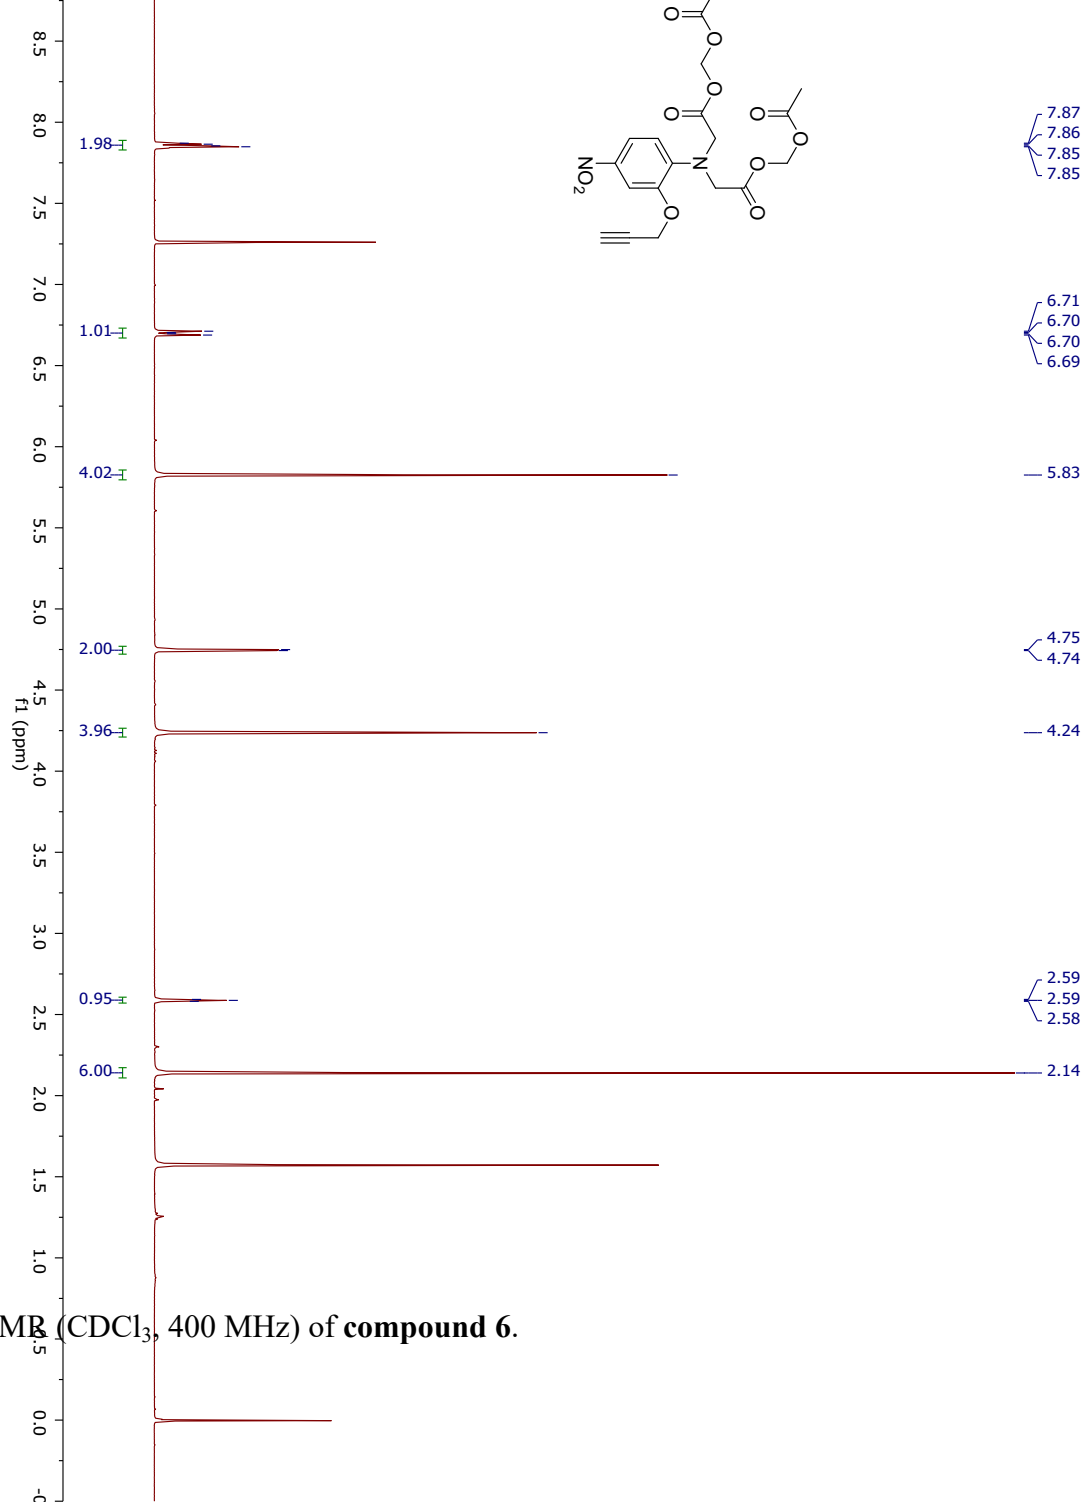

Figure S16.  $^1\text{H}$  NMR ( $\text{CDCl}_3$ , 400 MHz) of **compound 6**.

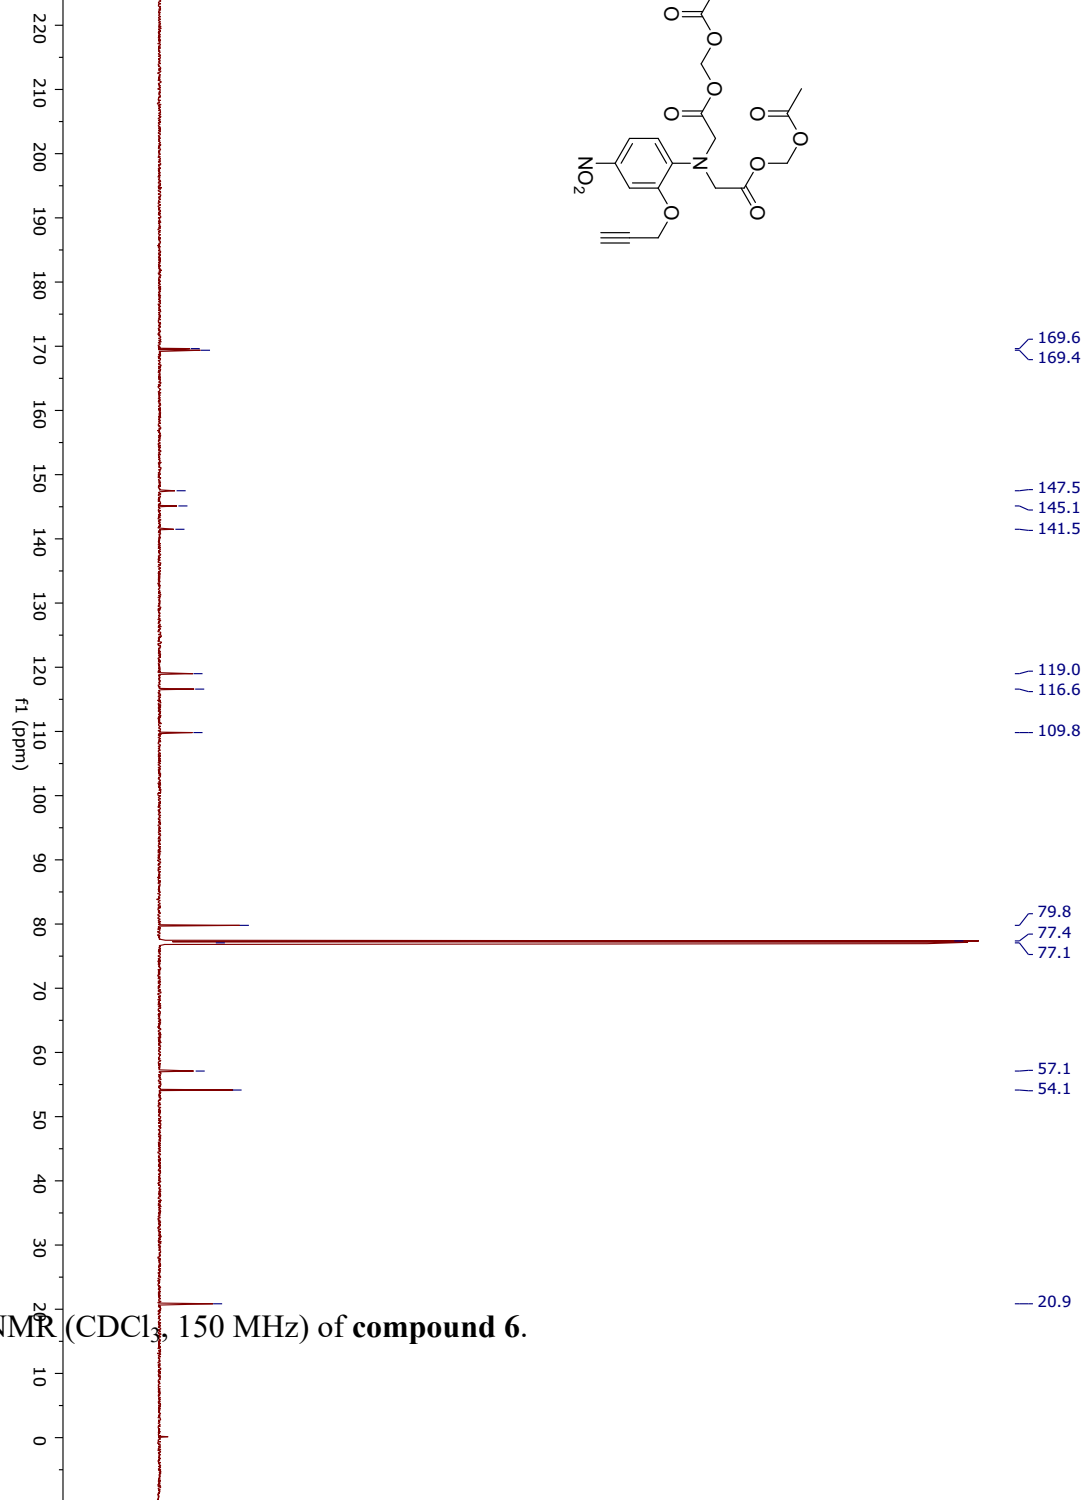

Figure S17.  $^{13}\text{C}$  NMR (CDCl<sub>3</sub>, 150 MHz) of **compound 6**.

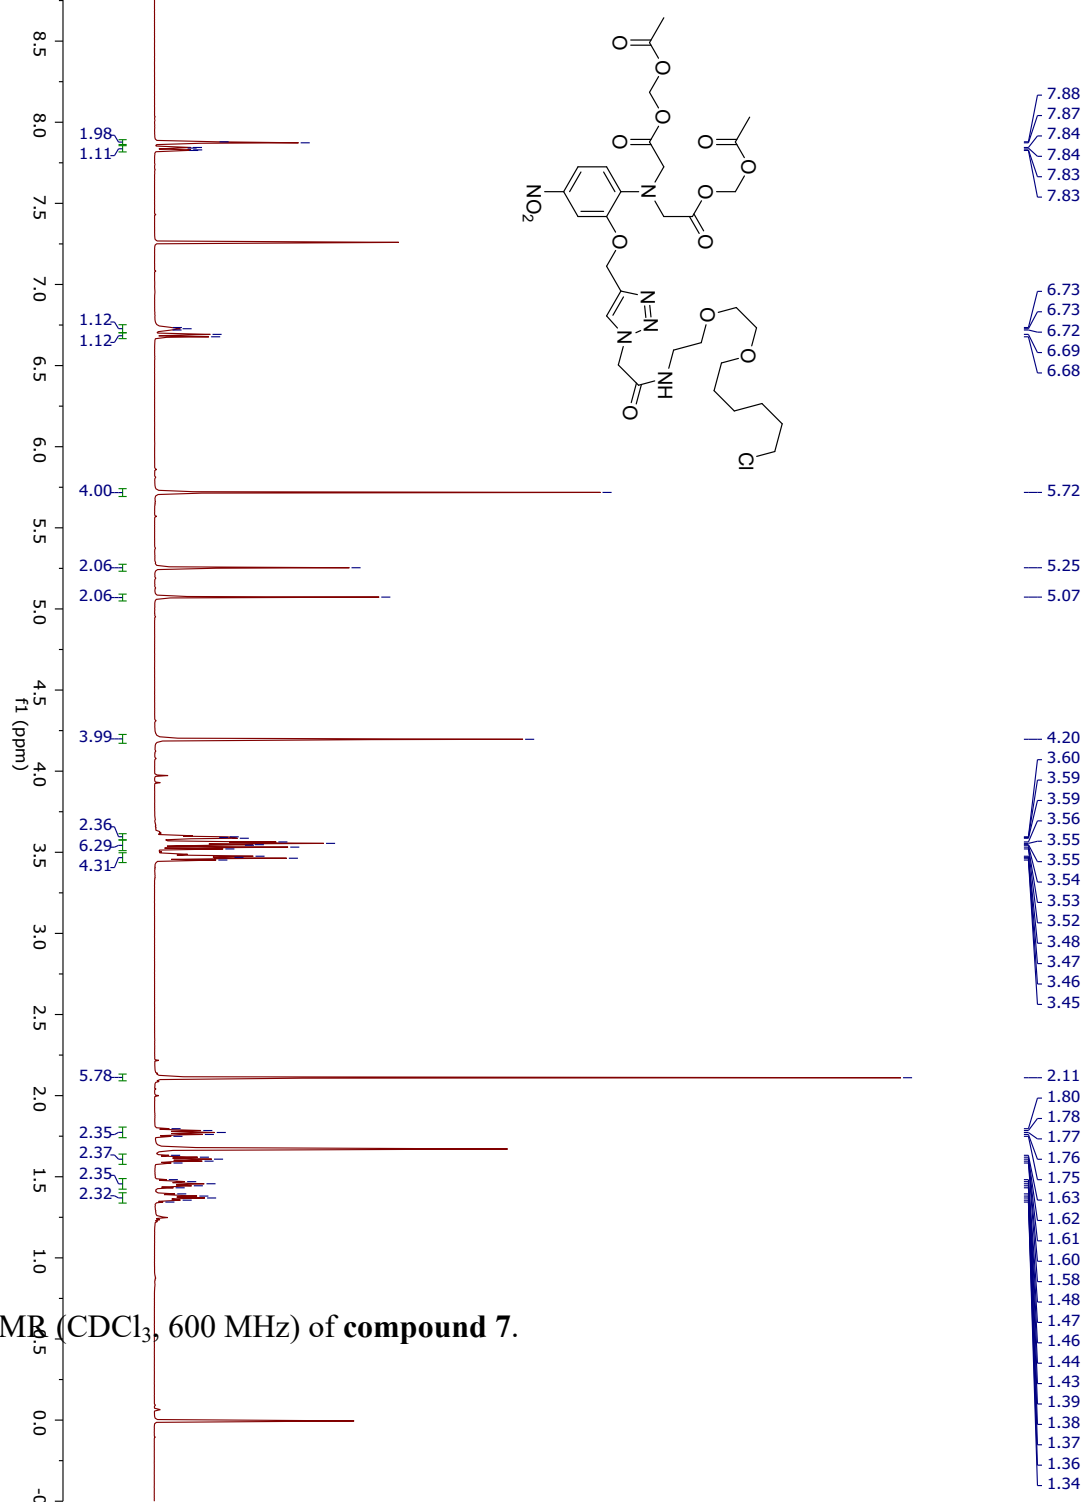

Figure S18.  $^1\text{H}$  NMR ( $\text{CDCl}_3$ , 600 MHz) of compound 7.

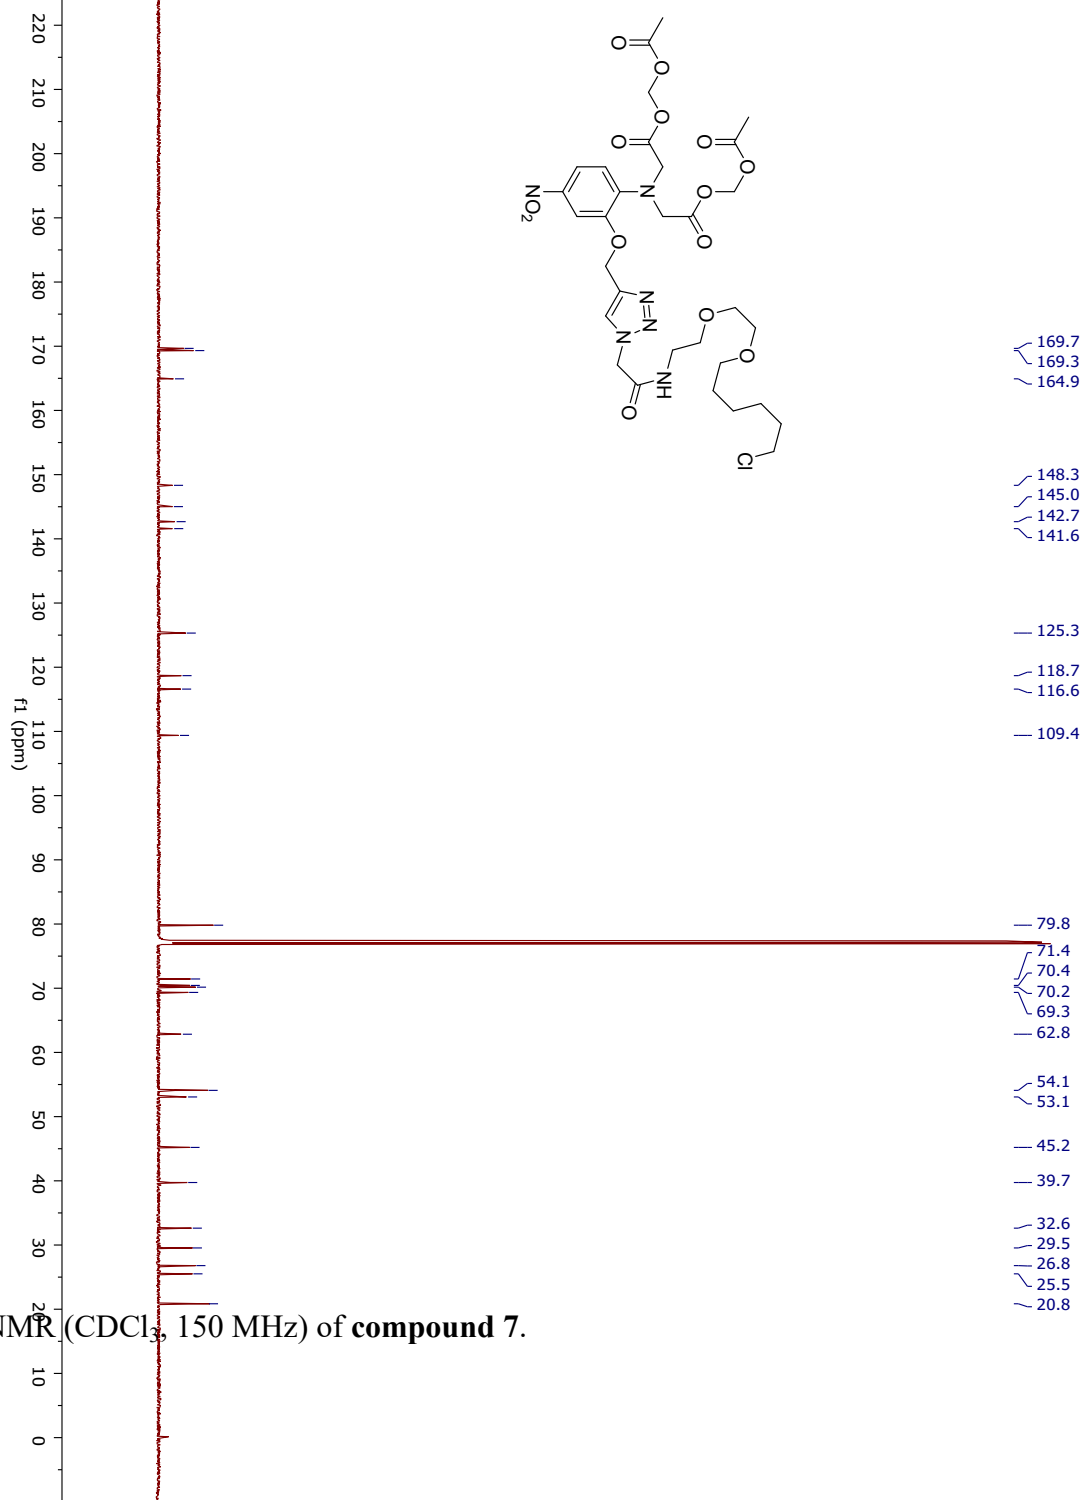

Figure S19.  $^{13}\text{C}$  NMR ( $\text{CDCl}_3$ , 150 MHz) of **compound 7**.

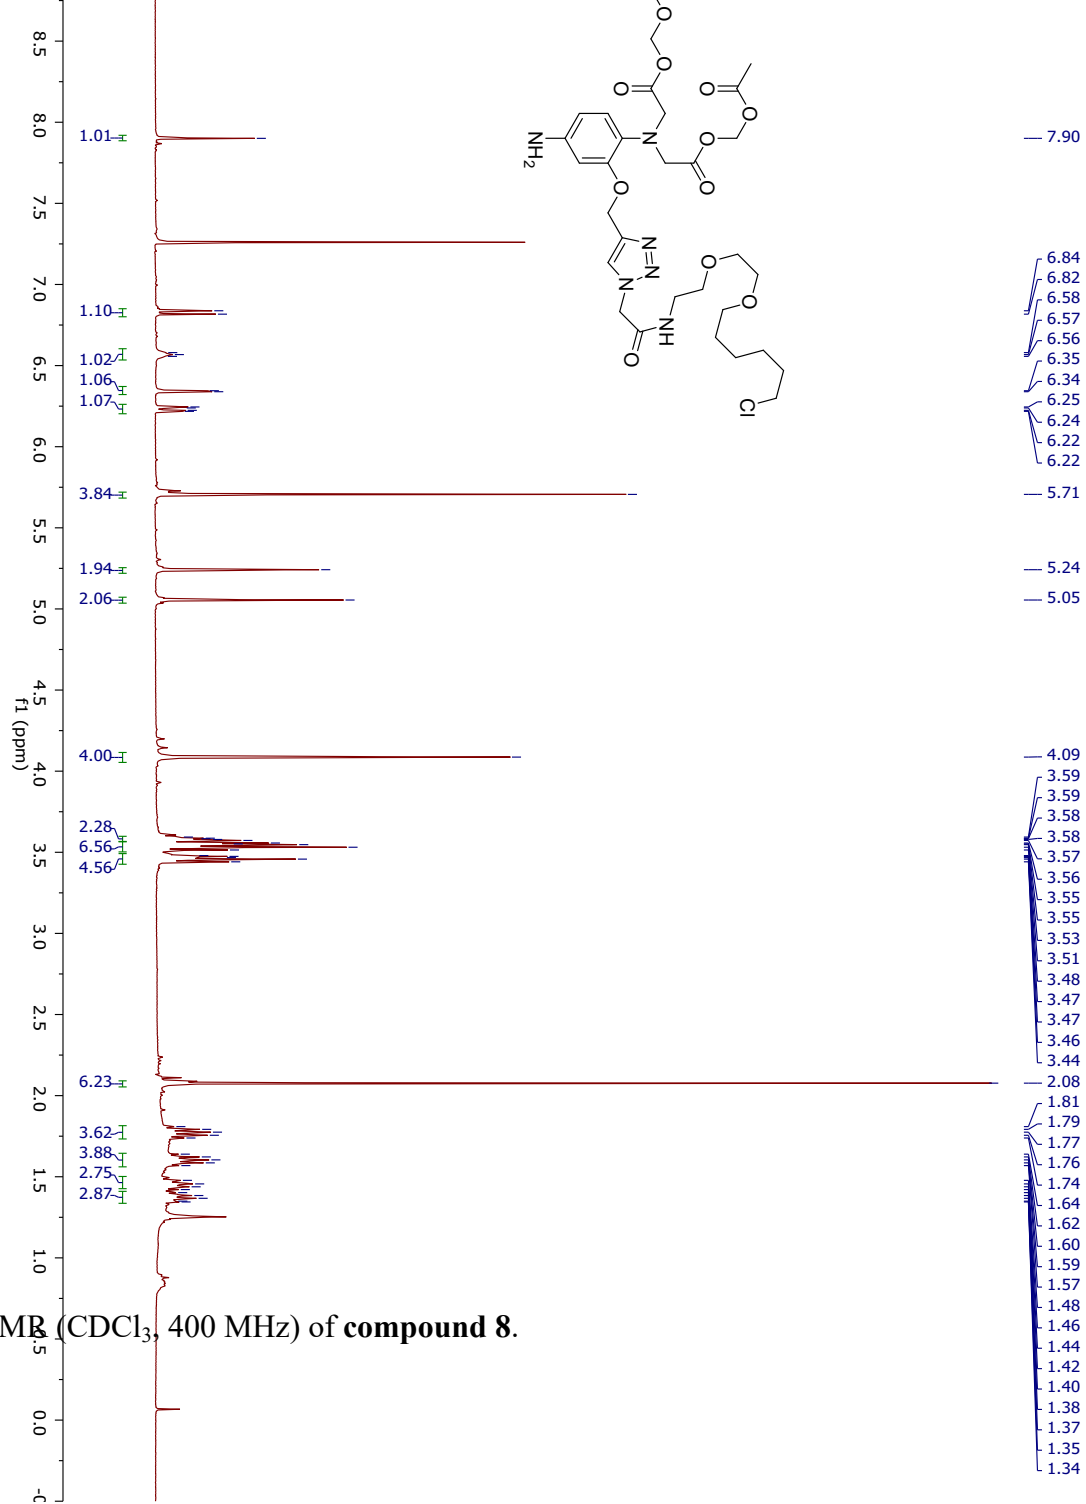

Figure S20. <sup>1</sup>H NMR (CDCl<sub>3</sub>, 400 MHz) of compound 8.

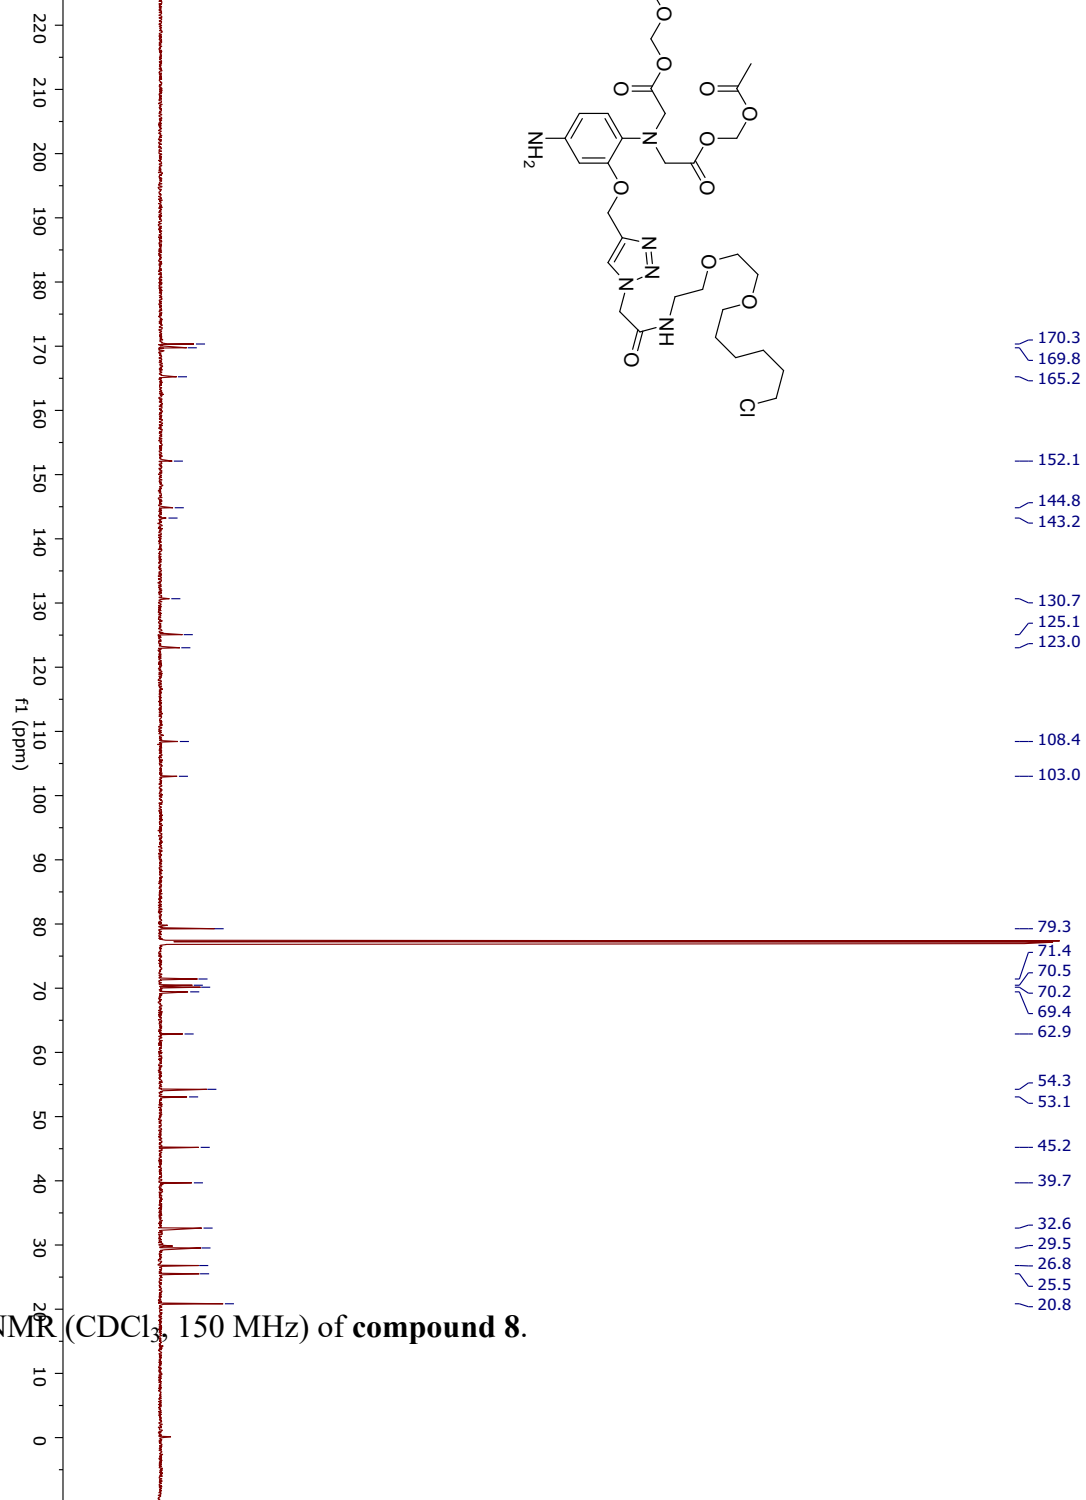

Figure S21.  $^{13}\text{C}$  NMR ( $\text{CDCl}_3$ , 150 MHz) of **compound 8**.

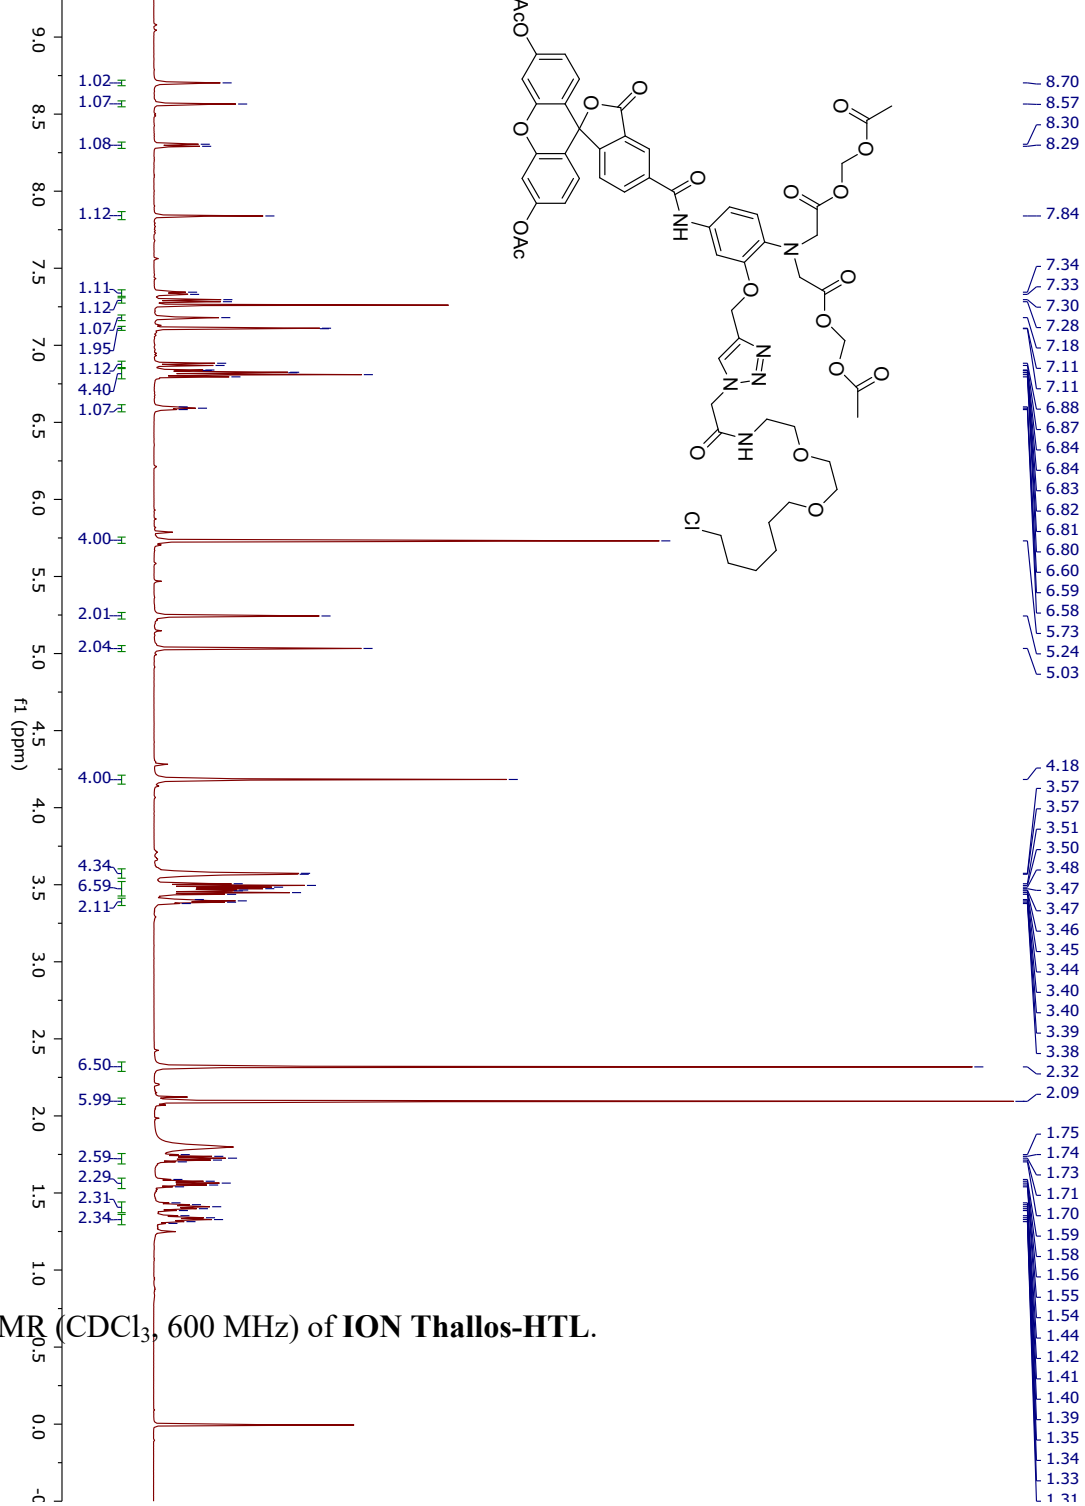

Figure S22.  $^1\text{H}$  NMR (CDCl<sub>3</sub>, 600 MHz) of ION Thallos-HTL.

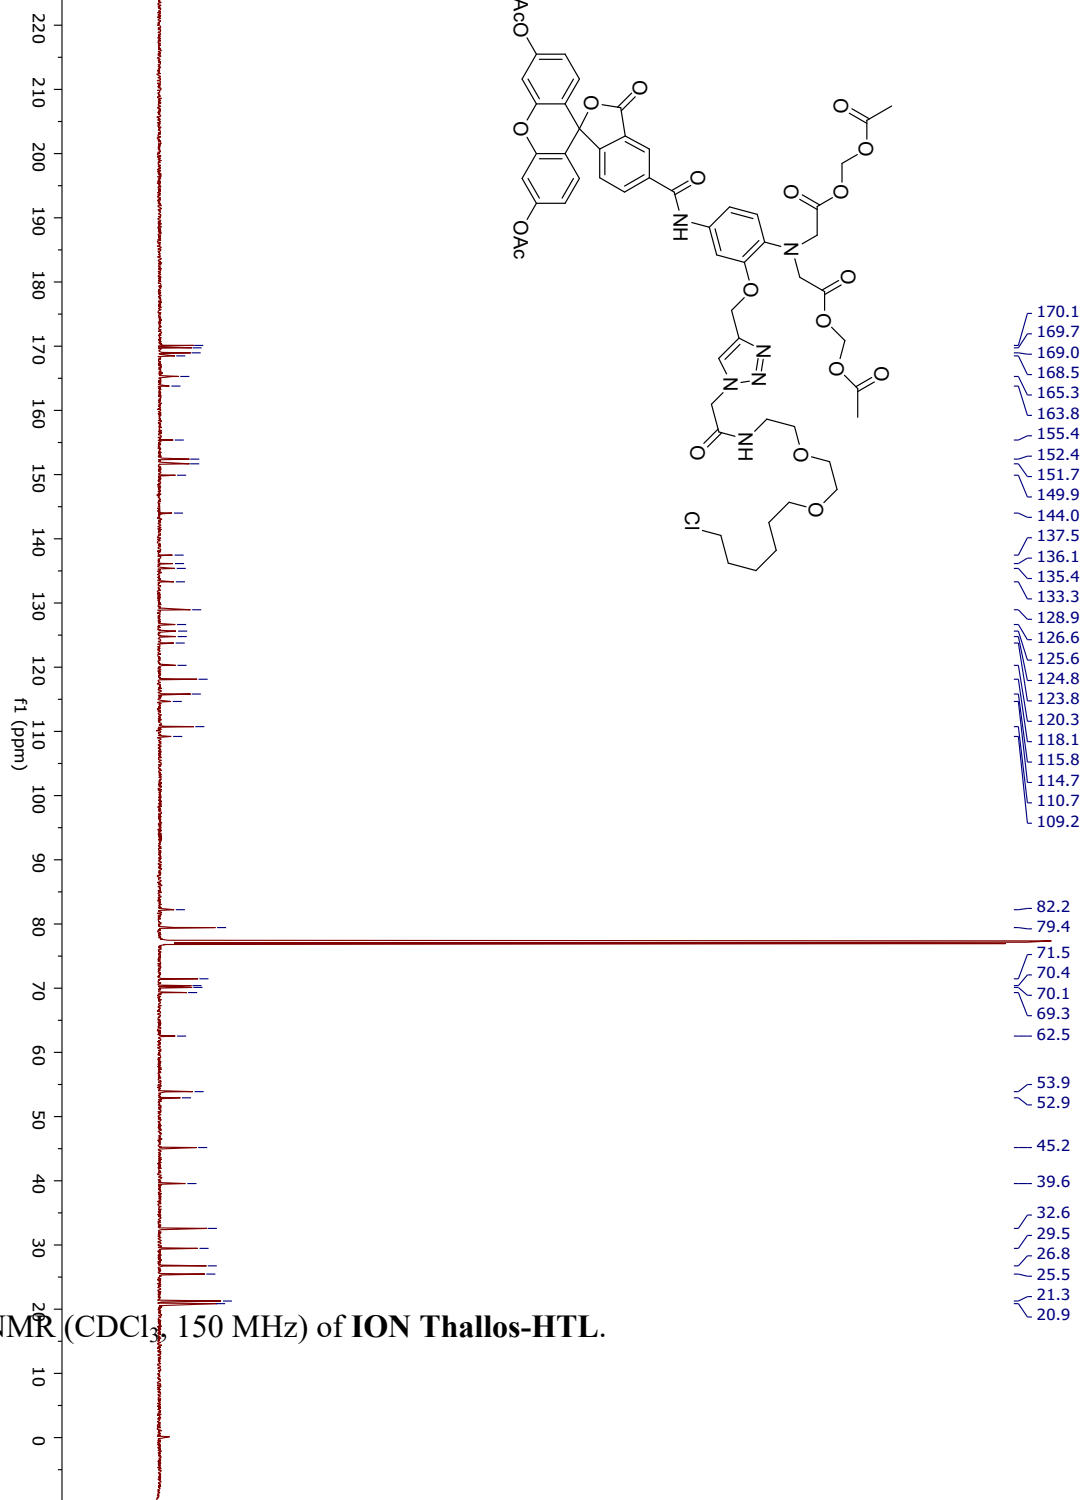

Figure S23. <sup>13</sup>C NMR (CDCl<sub>3</sub>, 150 MHz) of ION Thallos-HTL.

## References

1. Umberger, J. Q.; LaMer, V. K., The Kinetics of Diffusion Controlled Molecular and Ionic Reactions in Solution as Determined by Measurements of the Quenching of Fluorescence<sup>1,2</sup>. *Journal of the American Chemical Society* **1945**, *67* (7), 1099-1109.
2. Wolf, A. V., *Aqueous solutions and body fluids; their concentrative properties and conversion tables*. Hoeber Medical Division, Harper & Row: New York, 1966.
3. [https://advancedbiomatrix.com/Refractive%20Index%20and%20Total%20Solids%20of%20Extracellular%20Matrix%20\(ECM\)%20Solutions%20and%20Buffer.pdf](https://advancedbiomatrix.com/Refractive%20Index%20and%20Total%20Solids%20of%20Extracellular%20Matrix%20(ECM)%20Solutions%20and%20Buffer.pdf)



4. Schoenmakers, T. J.; Visser, G. J.; Flik, G.; Theuvenet, A. P., CHELATOR: an improved method for computing metal ion concentrations in physiological solutions. *Biotechniques* **1992**, *12* (6), 870-4, 876-9.
5. Bers, D. M.; Patton, C. W.; Nuccitelli, R., Chapter 1 - A Practical Guide to the Preparation of Ca<sup>2+</sup> Buffers. In *Methods in Cell Biology*, Whitaker, M., Ed. Academic Press: 2010; Vol. 99, pp 1-26.
